1 **LFMD: detecting low-frequency mutations in genome sequencing data without**  
2 **molecular tags**

3

4 Rui Ye<sup>1,2,7\*</sup>, Jie Ruan<sup>2,7\*</sup>, Xuehan Zhuang<sup>3\*</sup>, Yanwei Qi<sup>2,7</sup>, Yitai An<sup>2,7</sup>, Jiaming Xu<sup>2,7</sup>,  
5 Timothy Mak<sup>4</sup>, Xiao Liu<sup>2,7</sup>, Xiuqing Zhang<sup>2,7</sup>, Huanming Yang<sup>2,6,7</sup>, Xun Xu<sup>2,7</sup>, Larry  
6 Baum<sup>1,4,5</sup>, Chao Nie<sup>2,7#</sup> & Pak Chung Sham<sup>1,4,5#</sup>

7

8 <sup>1</sup>Department of Psychiatry, Li Ka Shing Faculty of Medicine, The University of Hong Kong,  
9 Hong Kong, China;

10 <sup>2</sup>BGI-Shenzhen, Shenzhen 518083, China;

11 <sup>3</sup>Department of Surgery, Li Ka Shing Faculty of Medicine, The University of Hong Kong;  
12 Hong Kong, China;

13 <sup>4</sup>Center for Genomic Sciences, The University of Hong Kong, Hong Kong, China;

14 <sup>5</sup>State Key Laboratory of Brain and Cognitive Sciences, The University of Hong Kong, Hong  
15 Kong, China;

16 <sup>6</sup>James D. Watson Institute of Genome Sciences, Hangzhou, China;

17 <sup>7</sup>China National GeneBank, BGI-Shenzhen, Shenzhen 518120, China;

18 \*These authors contributed equally to this work.

19 #Correspondence should be addressed to C.N. ([niechao@genomics.cn](mailto:niechao@genomics.cn)) or P.C.S  
20 ([pcsham@hku.hk](mailto:pcsham@hku.hk)).

21

22 V4.0 on 2019.09.12

23

24 **Abstract**

25

26 As next-generation sequencing (NGS) and liquid biopsy become more prevalent in clinic and  
27 research, for cancer diagnosis, molecular target identification, and disease monitoring, there  
28 is an increasing need for better methods to reduce cost and improve sensitivity and specificity  
29 of mutation detection. Since NGS has an error rate of around 1%, it is difficult to accurately  
30 and efficiently identify mutations with less than 1% frequency in a sample. Here we propose  
31 a likelihood-based approach, called Low-Frequency Mutation Detector (LFMD), which  
32 combines the advantages of duplex sequencing (DS) and bottleneck sequencing system  
33 (BotSeqS) to maximize the utilization of duplicate sequence reads. Compared with DS, the

34 new method achieves higher sensitivity (improved by ~16%), higher specificity and lower  
35 cost (reduced by ~70%) without involving additional experimental steps, customized adapters  
36 or molecular tags. In addition, this method can also be used to improve sensitivity and  
37 specificity of other variant calling algorithms by making it unnecessary to remove  
38 polymerase chain reaction (PCR) duplicates.

39

## 40 **Introduction**

41

42 At the individual level, low-frequency mutations (LFMs) are defined as mutations with allele  
43 frequency lower than 5% or 1% in an individual's DNA. LFMs can indicate early stages of  
44 cancer and Alzheimer's Disease (AD)(1), distinguish samples from people of different ages  
45 (2), identify disease-causing variants(3), predict potential drug resistance(4), diagnose  
46 mitochondrial disease before tri-parental *in vitro* fertilization(5), and track the mutational  
47 spectrum of viral genomes, malignant lesions, and somatic tissues(4,6). To effectively  
48 improve signal-to-noise ratio (SNR) and detect LFMs, researchers have developed methods  
49 with stringent thresholds, complex experimental procedures(1,7), single cell sequencing(8-  
50 11), circle sequencing(12), and more precise analytic models(2,13). The bottleneck  
51 sequencing system(14) (BotSeqS) and duplex sequencing(15,16) (DS) utilize duplicate reads  
52 generated by polymerase chain reaction (PCR), which are discarded by other methods, to  
53 achieve much higher accuracy. However, current methods still have some limitations in  
54 detecting LFMs.

55

### 56 *Disadvantages of single cell sequencing and circle sequencing*

57

58 For single cell sequencing, DNA extraction is laborious and exacting, with point mutations  
59 and copy number biases introduced during the amplification of small amounts of fragile  
60 DNA. To increase specificity, only variants shared by at least two cells are accepted as true  
61 variants(11). At present, this method is not cost-efficient and cannot be used in large-scale  
62 clinical applications because a large number of single cells need to be sequenced to identify  
63 rare mutations.

64

65 Circle sequencing only utilizes a single strand of DNA, so its specificity is limited by the  
66 error rate of PCR. It controls errors to a rate as low as  $7.6 \times 10^{-6}$  per base sequenced(12)  
67 while DS can achieve  $4 \times 10^{-10}$  errors per base sequenced(15).

68

69 *Disadvantages of BotSeqS*

70

71 In contrast, BotSeqS uses endogenous molecular tags to group reads from the same DNA  
72 template and construct double-strand consensus reads. As a result, it can detect very rare  
73 mutations ( $<10^{-6}$ ) while being cheap enough to sequence the whole human genome(14).  
74 However, it requires highly diluted DNA templates before PCR amplification to reduce  
75 endogenous tag conflicts and ensure sufficient sequencing of each DNA template. Thus, it  
76 has a high specificity with poor sensitivity. Also, it discards clonal variants and small  
77 insertions/deletions (InDels) to limit false positives.

78

79 *Disadvantages of DS*

80

81 Another promising method to eliminate tag conflicts is Duplex sequencing (DS), which  
82 ligates exogenous random molecular tags (also known as unique molecular identifier, UID or  
83 UMI) to both ends of each DNA template before PCR amplification. Although sensitive and  
84 accurate, much sequencing data is wasted on sequence tags, fixed sequences and a large  
85 proportion of read families that contain only one read pair, which arose from a sequencing  
86 error on a tag. Since random molecular tags are synthesized with customized adapters, batch  
87 effects might occur during DNA library construction. Additionally, DS only works on  
88 targeted small genome regions(2,15) rather than on the whole genome.

89

90 *Disadvantages of Tag clustering*

91

92 To solve the problem induced by the errors on tags, multiple methods have been developed to  
93 cluster similar tags(17-19), where one or two mismatches are allowed in merging two tags.  
94 Although tag clustering does improve the sensitivity, it is still not a straightforward way to  
95 solve the problem. Inappropriate tag clustering might occur because unstable synthesis of  
96 random tags can result in distinct but similar tags. The performance of this approach has not  
97 been well studied and reported yet.

98

99 *A new approach*

100

101 To avoid the aforementioned problems, we present here a new, efficient approach that  
102 combines the advantages of BotSeqS and DS. The method uses a likelihood-based  
103 model(2,13) to dramatically reduce endogenous tag conflicts. Then it groups reads into read  
104 families and constructs double-strand consensus reads to detect ultra-rare mutations  
105 accurately while maximizing the utilization of non-duplicate read pairs. This simplifies the  
106 DNA sequencing procedure, saves data and cost, achieves higher sensitivity and specificity,  
107 and can be used in whole genome sequencing. In addition, our new method offers a statistical  
108 solution to the problem of PCR duplication in the basic analysis pipeline of next-generation  
109 sequencing (NGS) data and can improve sensitivity and specificity of other variant calling  
110 algorithms without requiring specific experimental designs. As the price of sequencing is  
111 falling, the depth and the rate of PCR duplication are rising. The method we present here  
112 might help deal with such high depth data more accurately and efficiently.

113

## 114 **Methodology**

115

116 Intuitively, to distinguish LFM (signal) from background PCR and sequencing errors  
117 (noise), we need to increase the SNR. To increase SNR, we need to either increase the  
118 frequency of mutations or reduce sequencing errors. Single cell sequencing increases the  
119 frequency of mutations by isolating single cells from the bulk population, while BotSeqS and  
120 DS reduce sequencing errors by identifying the major allele at each site of multiple reads  
121 from the same DNA template. In this paper, we only focus on the latter strategy.

122

123 To group reads from the same DNA template, the simplest idea is to group properly mapped  
124 reads with the same coordinates (i.e., chromosome, start position, and end position) because  
125 random shearing of DNA molecules can provide natural differences, called endogenous tags,  
126 between templates. A group of reads is called a read family. However, as the length of DNA  
127 template is approximately determined, random shearing cannot provide enough differences to  
128 distinguish each DNA template. Thus, it is common that two original DNA templates share  
129 the same coordinates. If two or more DNA templates shared the same coordinates, and their  
130 reads are grouped into a single read family, it is difficult to determine, using only their  
131 frequencies as a guide, whether an allele is a potential error or a mutation. Thus, BotSeqS  
132 introduced a strategy of dilution before PCR amplification to dramatically reduce the number  
133 of DNA templates in order to reduce the probability of endogenous tag conflicts. And DS  
134 introduced exogenous molecular tags before PCR amplification to dramatically increase the

135 differences between templates. Thus, BotSeqS sacrifices sensitivity and DS sequences extra  
136 data: the tags.

137

138 Here we introduce a third strategy to eliminate tag conflicts. It is a likelihood-based approach  
139 based on an intuitive hypothesis: that if reads of two or more DNA templates group together,  
140 a true allele's frequency in this read family is high enough to distinguish the allele from  
141 background sequencing errors. The overview of the LFMD pipeline is shown in Figure 1.

142

143 **Figure 1.** Overview of the LFMD pipeline. The Y-shaped adapters determine read 1 (purple  
144 bar) and 2 (green bar). The directions of reads determine +/- strands. So after the first cycle of  
145 the PCR amplification, the Watson and Crick families are well defined. Then within a read  
146 family, true alleles (green dots) and accumulated PCR errors (blue dots) are detected via the  
147 likelihood-base model and given a combined error rate. Sequencing errors (red dots) are  
148 eliminated. Combining single-strand consensus sequences (SSCSs) of paired read families,  
149 high-quality double-strand consensus sequence (DCSs) with estimated error rates are  
150 generated and used in the downstream analysis.

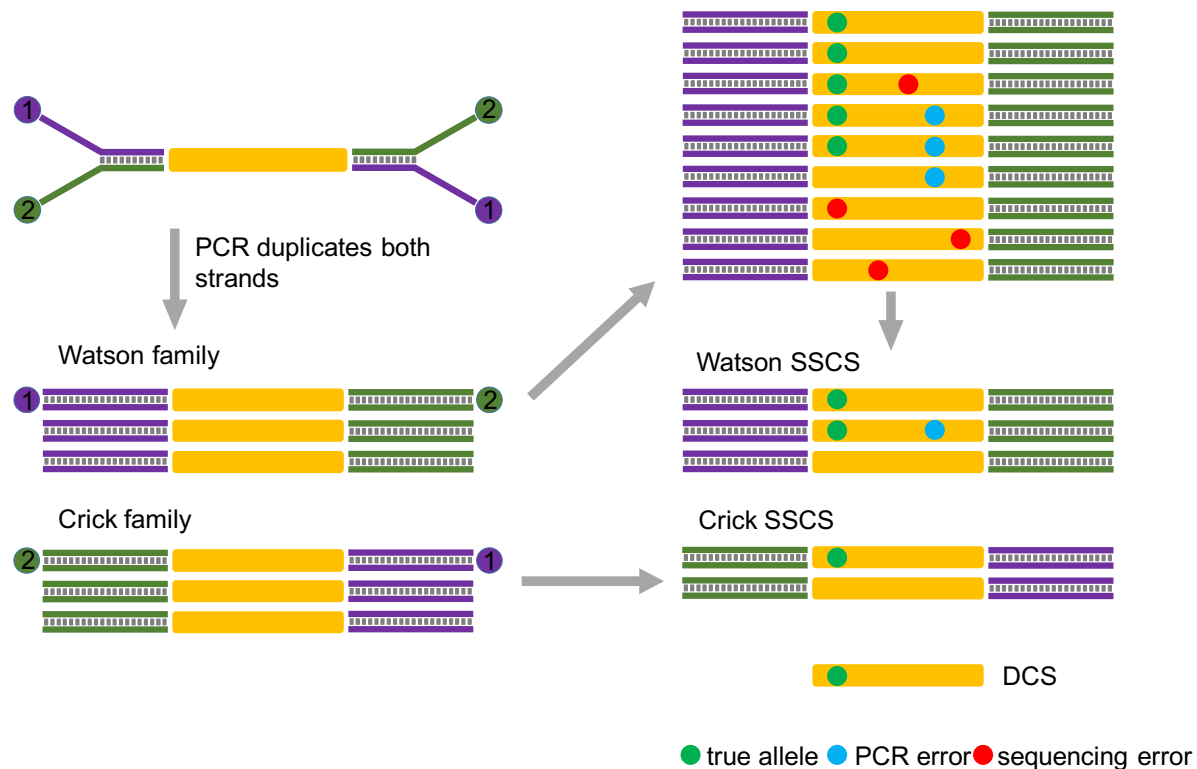

151

152

153 *Likelihood-based model*

154

155 We aim to identify alleles at each potential heterozygous position in a read family (grouped  
156 according to endogenous tags). Then based on those heterozygous sites, we split the mixed  
157 read family into smaller ones, and compress each one into a consensus read. Finally, we  
158 detect mutations based on all consensus reads, which have much lower error rates than 0.1%.

159

160 First, we define a Watson strand as a read pair for which read 1 is the plus strand while read 2  
161 is the minus strand. A Crick strand is defined as a read pair for which read 1 is the minus  
162 strand while read 2 is the plus strand. The plus and minus strands are also known as the  
163 forward and reverse strands according to the reference genome. Read 1 and 2 are derived  
164 from raw pair-end fastq files. Thus a read family which contains Watson and Crick strand  
165 reads simultaneously is an ideal read family because it is supported by both strands of the  
166 original DNA template. Second, we select potential heterozygous sites which meet the  
167 following criteria: 1) the minor allele is supported by both Watson and Crick reads; 2) minor  
168 allele frequencies in both Watson and Crick read family are greater than approximately the  
169 average sequencing error rate, often 1% or 0.1%; 3) low-quality bases ( $<Q20$ ) and low  
170 quality alignments ( $<Q30$ ) are excluded. Finally, we calculate the genotype likelihood in the  
171 Watson and Crick family independently in order to eliminate PCR errors during the first PCR  
172 cycle.

173

174 At each position of a Watson or Crick read family, let  $X$  denote the sequenced base and  $\theta$  the  
175 allele frequencies. Let  $P(x|\theta)$  be the probability mass function of the random variable  $X$ ,  
176 indexed by the parameter  $\theta = (\theta_A, \theta_C, \theta_G, \theta_T)^T$ , where  $\theta$  belongs to a parameter space  $\Omega$ . Let  
177  $g \in \{A, C, G, T\}$ , and  $\theta_g$  represent the frequency of allele  $g$  at this position. Obviously, we  
178 have boundary constraints for  $\theta$ :  $\theta_g \in [0, 1]$  and  $\sum \theta_g = 1$ .

179

180 Assuming  $N$  reads cover this position,  $x_i$  represents the base on read  $i \in \{1, 2, \dots, N\}$ , and  $e_i$   
181 denotes sequencing error of the base, we get

182

$$\begin{aligned} 183 \quad P(x_i = g|\theta) &= P(\text{no sequencing error} \mid \text{the base is } g) \cdot P(\text{the base is } g) \\ 184 \quad &+ P(\text{sequencing error with specific direction} \mid \text{the base is not } g) \\ 185 \quad &\cdot P(\text{the base is not } g) \\ 186 \quad &= (1 - e_i) \theta_g + \frac{e_i}{3} (1 - \theta_g) \end{aligned}$$

187

188 So the log-likelihood function can be written as

189 
$$\ell(\theta) = \sum_{i=1}^N \log P(x_i|\theta) = \sum_{i=1}^N \log \left( (1 - e_i) \theta_g + \frac{e_i}{3} (1 - \theta_g) \right), \quad g = x_i$$

190

191 Thus, for each candidate allele  $g$ , under the null hypothesis  $H_0: \theta_g = 0, \theta \in \Omega$ , and the

192 alternative hypothesis  $H_1: \theta_g \neq 0, \theta \in \Omega$ , the likelihood ratio test is

193 
$$t_g = -2\{\ell_0(\theta) - \ell_1(\theta)\} \sim \chi_1^2$$

194

195 However, as  $\theta_g = 0$  lies on the boundary of the parameter space, the general likelihood ratio

196 test needs an adjustment to fit  $\chi_1^2$ . Because the adjustment is related to calculation of a

197 tangent cone(20) in constrained 3-dimensional parameter space, and the computation is too

198 complicated and time-consuming for large scale NGS data, here we use a simplified,

199 straightforward adjustment(21) presented by Chen et al in 2017. (Details in Supplemental

200 materials)

201

202 Interestingly, we finally arrive at a general conclusion that the further adjustment of  $\chi_1^2$  is not

203 helpful in similar cases although the asymptotic distribution we use is not perfect when  $N$  is

204 small (e.g.,  $N < 5$ ). Alternative approaches might be derived in the future. We also compared

205 theoretical P-values with empirical P-values from Monte Carlo procedures (Figure 2),

206 explored the power of our model under truly and uniformly distributed sequencing errors

207 (Supplemental Material, Figure S1), and evaluated the accuracy of allele fraction

208 (Supplemental Material, Figure S2). The simulation results support the theoretical conclusion

209 sufficiently.

210

211 **Figure 2.** The comparison between theoretical and empirical P-values from Monte Carlo

212 procedures under truly distributed sequencing error rates. With the null hypothesis, one

213 million simulations were conducted.

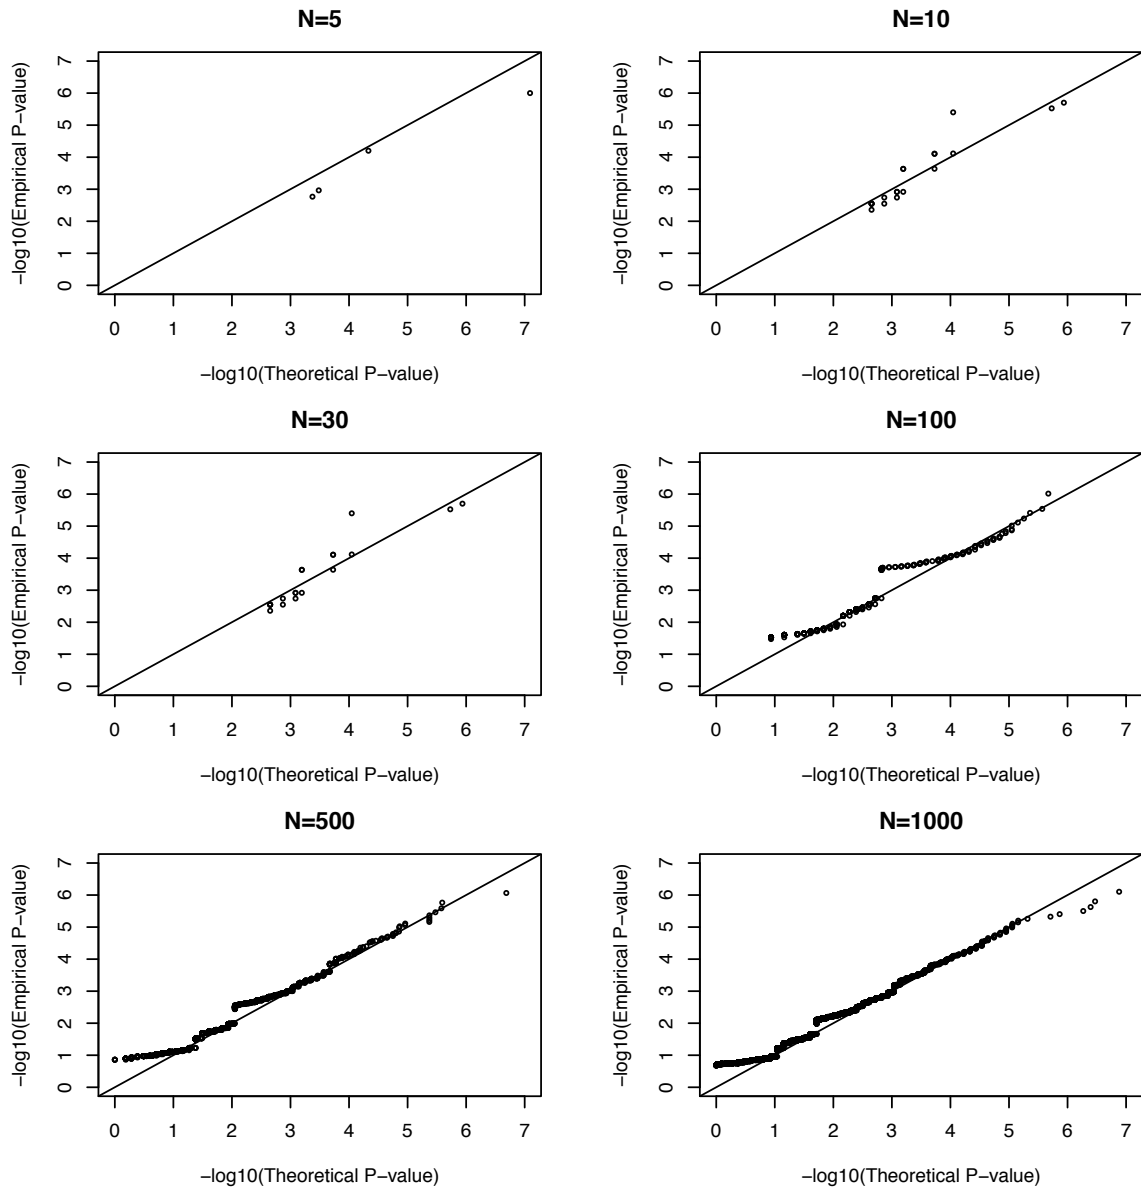

214

215

216 Because the null and alternative hypotheses have two and three free variables respectively,

217 the Chi-square distribution has 1 degree of freedom. The P-value of the allele  $g$  can then be

218 given

219

$$P_g = 1 - \text{cdf}(t_g)$$

220

221 where  $\text{cdf}(x)$  is the cumulative density function of the  $\chi_1^2$  distribution. If  $P_g$  is less than a

222 given threshold  $\alpha$ , the null hypothesis is rejected and the allele  $g$  is treated as a candidate

223 allele of the read family.

224



225 Although  $P_g$  cannot be interpreted as the probability that  $H_{0,g}$  is true and allele  $g$  is an error,  
226 it is a proper approximation of the error rate of allele  $g$ . We only reserve alleles with  $P_g \leq \alpha$   
227 in both Watson and Crick families and substitute others with “N”. Then Watson and Crick  
228 families are compressed into several single-strand consensus sequences (SSCSs). The SSCSs  
229 might contain haplotype information if more than one heterozygous site is detected. Finally,  
230 SSCSs which are consistent in both Watson and Crick families are claimed as double-strand  
231 consensus sequences (DCSs).

232

233 For each allele on a DCS, let  $P_w(g)$  and  $P_c(g)$  represent the relative error rates of the given  
234 allele in the Watson and Crick family respectively, and let  $P_{wc}(g)$  denote the united error rate  
235 of the allele. Thus,

$$236 \quad P_{wc}(g) = P_w(g) + P_c(g) - P_w(g)P_c(g)$$

237

238 For a read family which proliferated from  $n$  original templates, a coalescent model can be  
239 used to model the PCR procedure(22). The exact coalescent PCR error rate is too  
240 complicated to be calculated quickly, so we tried to give a rough estimate. According to the  
241 model, a PCR error proliferates and its fraction decreases exponentially with the number of  
242 PCR cycles,  $m$ . For example, an error that occurs in the first PCR cycle would occupy half of  
243 the PCR products, an error that occurs in the second cycle occupies a quarter, the third only  
244 1/8, and so on. As we only need to consider PCR errors which are detectable, the coalescent  
245 PCR error rate is defined as the probability to detect a PCR error whose frequency  $\geq 2^{-m}/n$ ,  
246 and it is equal to or less than

$$247 \quad 1 - (1 - \text{error rate per cycle})^{2^m - 1}$$

248

249 Let  $e_{pcr}(g)$  denote the coalescent PCR error rate and  $P_{pcr}(g)$  the united PCR error rate of the  
250 double strand consensus allele. Then we get

$$251 \quad P_{pcr}(g) \approx n * e_{pcr}(g)^2$$

252

253 Because the PCR fidelity ranges from  $10^{-5}$  to  $10^{-7}$ , we get  $P_{wc}(g)P_{pcr}(g) \approx 0$ , then the  
254 combined base quality of the allele on the DCS is

$$255 \quad Q(g) = -10 \log_{10} (P_{wc}(g) + P_{pcr}(g))$$

256

257

258 Then  $Q(g)$  is transferred to an ASCII character, and a series of characters make a base  
259 quality sequence for the DCS. Finally, we generate a BAM file with DCSs and their quality  
260 sequences.

261

262 With the BAM file which contains all the high-quality DCS reads, the same approach is used  
263 to give each allele a P-value at each genomic position which is covered by DCS reads.

264 Adjusted P-values (q-values) are given via the Benjamin-Hochberg procedure. The threshold  
265 of q-values is selected according to the total number of tests conducted and false discovery  
266 rate (FDR) which can be accepted.

267

268 A similar mathematical model was described in detail in previous papers by Ding et al(2) and  
269 Guo et al(13). Ding et al. used this model to reliably call mutations with frequency  $> 4\%$ . In  
270 contrast, we use this model to deal with read families rather than non-duplicate reads. In a  
271 mixed read family, most of the minor allele frequencies are larger than 4%, so the power of  
272 the model meets our expectation.

273

274 For those reads containing InDels, the CIGAR strings in BAM files contain I or D. It is  
275 obvious that reads with different CIGAR strings cannot fit into one read family. Thus,  
276 CIGAR strings can also be used as part of endogenous tags. In contrast, the soft-clipped part  
277 of CIGAR strings cannot be ignored when considering start and end positions because low-  
278 quality parts of reads tend to be clipped, and the coordinates after clipping are not a proper  
279 endogenous tag for the original DNA template.

280

## 281 **Results**

282

### 283 *Simulated data*

284

285 We used Python scripts developed by the Du Novo(23) team to simulate mixed double-strand  
286 sequencing data, which were analyzed using LFMD and DS. Although the simulation may  
287 not be entirely realistic, the results are still useful to evaluate the performance and the  
288 potential drawbacks of LFMD and DS. Because the underlying true mutations are known, the  
289 true positives and false positives can be calculated. We found that DS made two false  
290 positive rare variant calls due to mapping errors, which were not made by LFMD because it  
291 avoids mapping errors by skipping the realignment step. In the meanwhile, LFMD is much

292 more sensitive than DS according to Figure 3 and Table S1. The specificity of LFMD is  
293 slightly higher than that of DS shown in Table S2.

294

295 **Figure 3.** The sensitivity of DS and LFMD. SNV, single nucleotide variant; INS, small  
296 insertion; DEL, small deletion; AAF, alternative allele fraction.

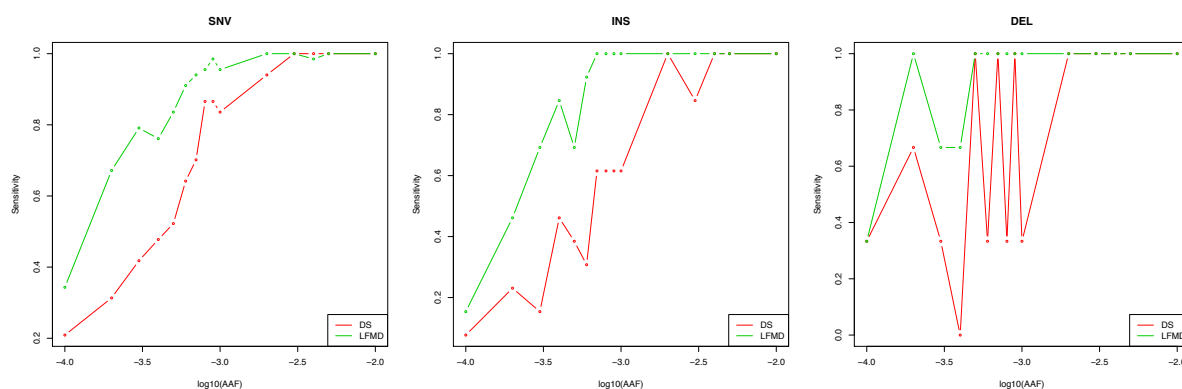

297

298

299 *Mouse mtDNA*

300

301 To evaluate the performance of LFMD in real data, we compared LFMD with DS on a DS  
302 dataset of mouse mtDNA: SRR1613972. A comparison of DS and LFMD pipelines is shown  
303 in Figure S3. We controlled almost all parameters to be the same in DS and LFMD and then  
304 compared the results although LFMD can achieve much higher sensitivity if we set the  
305 minimum number of supporting reads in each read family as 2 (DS suggests the parameter as  
306 3 to balance sensitivity and specificity). We found that mapping quality influenced the  
307 performance of both methods. To reduce the influence of mapping quality, we only use all  
308 unique proper mapped read pairs to call mutations. The results are shown in Table S3.

309

310 We investigated the discordant mutations one by one. The DS\_only mutations are all false  
311 positives due to read mapping errors (MT:7G>A and MT:3418T>del) and low sequencing  
312 quality (MT:5462T>G). The mapping errors are from the following: 1) DS assigns highest  
313 base quality for all bases of double-strand consensus sequence (DCS)(15) even though the  
314 base is 'N' and 2) DS introduces more 'N' in DCS reads because the minimum proportion of  
315 "true" bases in a read family is set to 0.7 by default (it can be set to 0.5 to improve  
316 sensitivity).

317

318 Among the 53 LFMD\_only mutations, 2 insertions and 3 deletions are missed by DS due to  
319 mapping errors of DCS, and 48 SNVs are not detected by DS due to three technical reasons:  
320 1) sequencing and PCR errors on tags lead to smaller read families in DS, decreasing its  
321 sensitivity; 2) DS discards some low complexity tags; 3) DS assumes “true” mutations should  
322 occupy most reads (proportion  $\geq 0.7$ ) in the reads family, although this assumption is  
323 unreasonable considering PCR errors in the first PCR cycle.

324

325 In summary, the discordant mutations in this dataset are mainly false positives and false  
326 negatives of DS. All LFMD\_only mutations are manually checked and well supported by  
327 read families under the same criteria of DS considering 1 or 2 sequencing and PCR errors on  
328 tags. Therefore, LFMD achieves higher sensitivity and specificity than DS in this dataset.

329

330 *Twenty-six human mtDNA samples from Prof. Kennedy’s laboratory(1)*

331

332 We compared the performance of DS and LFMD on 26 samples from Prof. Scott R.  
333 Kennedy’s laboratory. Only unique proper mapped reads were used to detect LFMs. The  
334 majority of LFMs were detected by both tools. Almost all LFMs detected only by DS were  
335 false positives due to alignment errors of DCS, while LFMD outputs BAM files directly and  
336 avoids alignment errors (Supplemental Material, Figure S3). LFMs only detected by LFMD  
337 are supported by raw reads if considering PCR and sequencing errors on molecular tags. As a  
338 result, LFMD is much more sensitive and accurate than DS. The improvement of sensitivity  
339 is about 16% according to Table S4.

340

341 *YH cell line*

342

343 We sequenced the YH cell line (passage 19) in 8 independent experiments to evaluate the  
344 stability of LFMD. The experimental details can be found in the Materials part. The results,  
345 shown in Supplemental Materials, Table S5 and Figure S4, from the 8 parallel samples are  
346 highly consistent in terms of numbers of mutations detected (range 61~68). Under the  
347 hypothesis that true mutations should be identified from at least two samples, we detected 68  
348 “true” mutations and the mean true positive rate (TPR) and false discovery rate (FDR) are  
349 around 91.36% and 2.36% respectively.

350

351 *ABL1 data*

352

353 Using the duplex sequencing method in 2015, Schmitt et al. analyzed an individual with  
354 chronic myeloid leukemia who relapsed after targeted therapy with the drug, Imatinib (the  
355 Short Read Archive under accession SRR1799908). We analyzed this individual and found 5  
356 extra LFMs. Two of them are in the coding region of the *ABL1* gene and change amino acids:  
357 E255G and V256G. In the drug resistance database of COSMIC(24), we found that  
358 E255VDK, change of the 255<sup>th</sup> amino acid, is associated with resistance to the drugs  
359 Dasatinib, Imatinib, and Nilotinib, and V256L is related to resistance to the drug Imatinib.  
360 Although the directions of amino acid changes, in this case, are not the same as those in the  
361 database, these two additional LFMs still inferred potential resistance to the drug Imatinib  
362 and provided an additional explanation for the clinical relapse of leukemia. The annotation  
363 results of 5 LFMs are shown in Supplemental Materials, Table S6.

364

## 365 **Materials**

366

### 367 *Subject recruitment and sampling*

368

369 A lymphoblastoid cell line (YH cell line) established from the first Asian genome donor(25)  
370 was used. Total DNA was extracted with the MagPure Buffy Coat DNA Midi KF Kit  
371 (MAGEN). The DNA concentration was quantified by Qubit (Invitrogen). DNA integrity was  
372 examined by agarose gel electrophoresis. The extracted DNA was kept frozen at -80°C until  
373 further processing.

374

### 375 *Mitochondrial whole genome DNA isolation*

376

377 Mitochondrial DNA (mtDNA) was isolated and enriched by double/single primer set  
378 amplifying the complete mitochondrial genome. The samples were isolated using a single  
379 primer set (LR-PCR4) by ultra-high-fidelity Q5 DNA polymerase following the protocol of  
380 the manufacturer (NEB) (Table S7).

381

### 382 *Library construction and mitochondrial whole genome DNA sequencing*

383

384 For the BGISEq-500 sequencing platform, mtDNA PCR products were fragmented directly  
385 by Covaris E220 (Covaris, Brighton, UK) without purification. Sheared DNA ranging from

386 150bp to 500bp without size selection was purified with an Axygen™ AxyPrep™ Mag PCR  
387 Clean-Up Kit. 100 ng of sheared mtDNA was used for library construction. End-repairing  
388 and A-tailing was carried out in a reaction containing 0.5 U Klenow Fragment  
389 (ENZYMATICS™ P706-500), 6 U T4 DNA polymerase (ENZYMATICS™ P708-1500),  
390 10 U T4 polynucleotide kinase (ENZYMATICS™ Y904-1500), 1 U rTaq DNA polymerase  
391 (TAKARA™ R500Z), 5 pmol dNTPs (ENZYMATICS™ N205L), 40 pmol dATPs  
392 (ENZYMATICS™ N2010-A-L), 1 X PNK buffer (ENZYMATICS™ B904) and water with  
393 a total reaction volume of 50 µl. The reaction mixture was placed in a thermocycler running  
394 at 37°C for 30 minutes and heat-denatured at 65°C for 15 minutes with the heated lid at 5°C  
395 above the running temperature. Adaptors with 10bp tags (Ad153-2B) were ligated to the  
396 DNA fragments by T4 DNA ligase (ENZYMATICS™ L603-HC-1500) at 25°C. The ligation  
397 products were PCR amplified. Twenty to twenty-four purified PCR products were pooled  
398 together in equal amounts and then denatured at 95°C and ligated by T4 DNA ligase  
399 (ENZYMATICS™ L603-HC-1500) at 37°C to generate a single-strand circular DNA library.  
400 Pooled libraries were made into DNA Nanoballs (DNB). Each DNB was loaded into one lane  
401 for sequencing.

402

403 Sequencing was performed according to the BGISEq-500 protocol (SOP AO) employing the  
404 PE100 mode. For reproducibility analyses, YH cell line mtDNA was processed four times  
405 following the same protocol as described above to serve as library replicates, and one of the  
406 DNBs from the same cell line was sequenced twice as sequencing replicates. A total of 8  
407 datasets were generated using the BGISEQ-500 platform. MtDNA sequencing was performed  
408 on the BGISEq-500 with 100bp paired-end reads. The libraries were processed for high-  
409 throughput sequencing with a mean depth of ~60000x.

410

411 The data that support the findings of this study have been deposited in the CNSA  
412 (<https://db.cngb.org/cnsa/>) of CNGBdb with accession code CNP0000297. Analysis codes  
413 used in this paper can be accessed at <https://github.com/RainyEricYe/LFMD>.

414

## 415 **Discussion**

416

417 LFMD is still expensive for target regions >2 Mbp in size because of the need for high  
418 sequencing depth. However, as the cost of sequencing continues to fall, it will become  
419 increasingly practical. In order to sequence a larger region at reduced cost, the dilution step of

420 BotSeqS can be introduced into the LFMD pipeline. Because LFMD can deal with tag  
421 conflicts, the dilution level might be decreased several magnitudes to increase the sensitivity.  
422 Additional experiments will be done soon.

423

424 Only accepting random sheared DNA fragments, not working on short amplicon sequencing  
425 data, and only working on pair-end sequencing data are known limitations of LFMD.  
426 Moreover, LFMD's precision is limited by the accuracy of the alignment software. Although  
427 tags are excluded in the model of LFMD, LFMD still has the potential to utilize tags and deal  
428 with amplicon sequencing data. The basic assumption in our model, that error rates are the  
429 same in all three directions, is not close enough to reality according to experimental data at  
430 present. These remain issues may be solved in the next version of LFMD.

431

432 To estimate the theoretical limit of LFMD, let read length be 100bp and the standard  
433 deviation (SD) of insert size be 20bp. Furthermore, let N represent the number of position  
434 families across one point. Then,  $N = (2 * 100) * (20 * 6) = 24000$  if only considering  $\pm 3$  SD.  
435 As the sheering of DNA is not random in the real world, it is safe to set N as 20,000. Ideally,  
436 the likelihood ratio test can detect mutations whose frequency is greater than 0.2% in a read  
437 family with Q30 bases. Thus, the theoretical limit of minor allele frequency is around  $1e-7$  (=  $0.002 / 20000$ ).  
438

439

440 LFMD reduces the cost dramatically mainly because it discards tags. First, for a typical  
441 100bp read, the lengths of the tags and the fixed sequences between the tag and the true  
442 sequence are 12bp and 5bp respectively. So  $(12+5) / 100 = 17\%$  of data are saved if we  
443 discard tags directly. Second, the efficiency of target capture decreases by about 10% to 20%  
444 because of the tags, according to in-house experiments. Third, LFMD can work on short read  
445 data of BGISEQ and then 30% to 40% of the cost can be saved because of the cheaper  
446 sequencing platform. Totally, the cost can be reduced by about 70%.

447

## 448 **Conclusion**

449

450 To eliminate endogenous tag conflicts, we use a likelihood-based model to separate the read  
451 family of the minor allele from that of the major allele. Without additional experimental steps  
452 and the customized adapters of DS, LFMD achieves higher sensitivity and specificity with  
453 lower cost comparing with by far the best method, DS. It is a general method that can be used

454 in several cutting-edge areas and its mathematical methodology can be generalized to  
455 increase the power of other NGS tools.

456

#### 457 **Acknowledgments**

458 We thank the Shenzhen Municipal Government of China for its support (No:  
459 JCYJ20170412153100794).

460

#### 461 **Funding**

462 This work is supported by the Shenzhen Municipal Government of China (No:  
463 JCYJ20170412153100794). The funders had no role in study design, data collection,  
464 analysis, decision to publish, or preparation of the manuscript.

465

466

#### 467 **References**

- 468 1. Hoekstra, J.G., Hipp, M.J., Montine, T.J. and Kennedy, S.R. (2016) Mitochondrial DNA  
469 mutations increase in early stage Alzheimer disease and are inconsistent with  
470 oxidative damage. *Annals of neurology*, **80**, 301-306.
- 471 2. Ding, J., Sidore, C., Butler, T.J., Wing, M.K., Qian, Y., Meirelles, O., Busonero, F., Tsoi,  
472 L.C., Maschio, A. and Angius, A. (2015) Assessing mitochondrial DNA variation and  
473 copy number in lymphocytes of ~ 2,000 Sardinians using tailored sequencing analysis  
474 tools. *PLoS genetics*, **11**, e1005306.
- 475 3. Wallace, D.C. and Chalkia, D. (2013) Mitochondrial DNA genetics and the  
476 heteroplasmy conundrum in evolution and disease. *Cold Spring Harbor perspectives*  
477 *in biology*, **5**, a021220.
- 478 4. Schmitt, M.W., Fox, E.J., Prindle, M.J., Reid-Bayliss, K.S., True, L.D., Radich, J.P. and  
479 Loeb, L.A. (2015) Sequencing small genomic targets with high efficiency and extreme  
480 accuracy. *Nature methods*, **12**, 423.
- 481 5. Dimond, R. (2015) Social and ethical issues in mitochondrial donation. *British medical*  
482 *bulletin*, **115**, 173.
- 483 6. Jabara, C.B., Jones, C.D., Roach, J., Anderson, J.A. and Swanstrom, R. (2011) Accurate  
484 sampling and deep sequencing of the HIV-1 protease gene using a Primer ID.  
485 *Proceedings of the National Academy of Sciences*, **108**, 20166-20171.
- 486 7. Marquis, J., Lefebvre, G., Kourmpetis, Y.A., Kassam, M., Ronga, F., De Marchi, U.,  
487 Wiederkehr, A. and Descombes, P. (2017) MitoRS, a method for high throughput,  
488 sensitive, and accurate detection of mitochondrial DNA heteroplasmy. *BMC*  
489 *genomics*, **18**, 326.
- 490 8. Kang, E., Wang, X., Tippner-Hedges, R., Ma, H., Folmes, C.D., Gutierrez, N.M., Lee, Y.,  
491 Van Dyken, C., Ahmed, R. and Li, Y. (2016) Age-related accumulation of somatic  
492 mitochondrial DNA mutations in adult-derived human iPSCs. *Cell Stem Cell*, **18**, 625-  
493 636.



- 494 9. Blandini, F., Greenamyre, J.T. and Nappi, G. (1996) The role of glutamate in the  
495 pathophysiology of Parkinson's disease. *Functional neurology*, **11**, 3-15.
- 496 10. Navin, N., Kendall, J., Troge, J., Andrews, P., Rodgers, L., McIndoo, J., Cook, K.,  
497 Stepansky, A., Levy, D. and Esposito, D. (2011) Tumour evolution inferred by single-  
498 cell sequencing. *Nature*, **472**, 90.
- 499 11. Baslan, T. and Hicks, J. (2014) Single cell sequencing approaches for complex  
500 biological systems. *Current opinion in genetics & development*, **26**, 59-65.
- 501 12. Lou, D.I., Hussmann, J.A., McBee, R.M., Acevedo, A., Andino, R., Press, W.H. and  
502 Sawyer, S.L. (2013) High-throughput DNA sequencing errors are reduced by orders of  
503 magnitude using circle sequencing. *Proceedings of the National Academy of Sciences*,  
504 **110**, 19872-19877.
- 505 13. Guo, Y., Li, J., Li, C.-I., Shyr, Y. and Samuels, D.C. (2013) MitoSeek: extracting  
506 mitochondria information and performing high-throughput mitochondria sequencing  
507 analysis. *Bioinformatics*, **29**, 1210-1211.
- 508 14. Hoang, M.L., Kinde, I., Tomasetti, C., McMahan, K.W., Rosenquist, T.A., Grollman,  
509 A.P., Kinzler, K.W., Vogelstein, B. and Papadopoulos, N. (2016) Genome-wide  
510 quantification of rare somatic mutations in normal human tissues using massively  
511 parallel sequencing. *Proceedings of the National Academy of Sciences*, **113**, 9846-  
512 9851.
- 513 15. Schmitt, M.W., Kennedy, S.R., Salk, J.J., Fox, E.J., Hiatt, J.B. and Loeb, L.A. (2012)  
514 Detection of ultra-rare mutations by next-generation sequencing. *Proceedings of the  
515 National Academy of Sciences*, **109**, 14508-14513.
- 516 16. Kennedy, S.R., Schmitt, M.W., Fox, E.J., Kohn, B.F., Salk, J.J., Ahn, E.H., Prindle, M.J.,  
517 Kuong, K.J., Shen, J.C., Risques, R.A. *et al.* (2014) Detecting ultralow-frequency  
518 mutations by Duplex Sequencing. *Nat Protoc*, **9**, 2586-2606.
- 519 17. Peng, Q., Satya, R.V., Lewis, M., Randad, P. and Wang, Y. (2015) Reducing  
520 amplification artifacts in high multiplex amplicon sequencing by using molecular  
521 barcodes. *BMC genomics*, **16**, 589.
- 522 18. Kou, R., Lam, H., Duan, H., Ye, L., Jongkam, N., Chen, W., Zhang, S. and Li, S. (2016)  
523 Benefits and challenges with applying unique molecular identifiers in next  
524 generation sequencing to detect low frequency mutations. *PLoS one*, **11**, e0146638.
- 525 19. Smith, T., Heger, A. and Sudbery, I. (2017) UMI-tools: modeling sequencing errors in  
526 Unique Molecular Identifiers to improve quantification accuracy. *Genome Res*, **27**,  
527 491-499.
- 528 20. Drton, M. (2009) Likelihood ratio tests and singularities. *The Annals of Statistics*, **37**,  
529 979-1012.
- 530 21. Chen, Y., Huang, J., Ning, Y., Liang, K.-Y. and Lindsay, B.G. (2017) A conditional  
531 composite likelihood ratio test with boundary constraints. *Biometrika*, **105**, 225-232.
- 532 22. Weiss, G. and Von Haeseler, A. (1997) A coalescent approach to the polymerase  
533 chain reaction. *Nucleic acids research*, **25**, 3082-3087.
- 534 23. Stoler, N., Arbeithuber, B., Guiblet, W., Makova, K.D. and Nekrutenko, A. (2016)  
535 Streamlined analysis of duplex sequencing data with Du Novo. *Genome biology*, **17**,  
536 180.
- 537 24. Tate, J.G., Bamford, S., Jubb, H.C., Sondka, Z., Beare, D.M., Bindal, N., Boutselakis, H.,  
538 Cole, C.G., Creatore, C. and Dawson, E. (2018) COSMIC: the catalogue of somatic  
539 mutations in cancer. *Nucleic acids research*, **47**, D941-D947.

- 540 25. Wang, J., Wang, W., Li, R., Li, Y., Tian, G., Goodman, L., Fan, W., Zhang, J., Li, J.,  
541 Zhang, J. *et al.* (2008) The diploid genome sequence of an Asian individual. *Nature*,  
542 **456**, 60-65.  
543

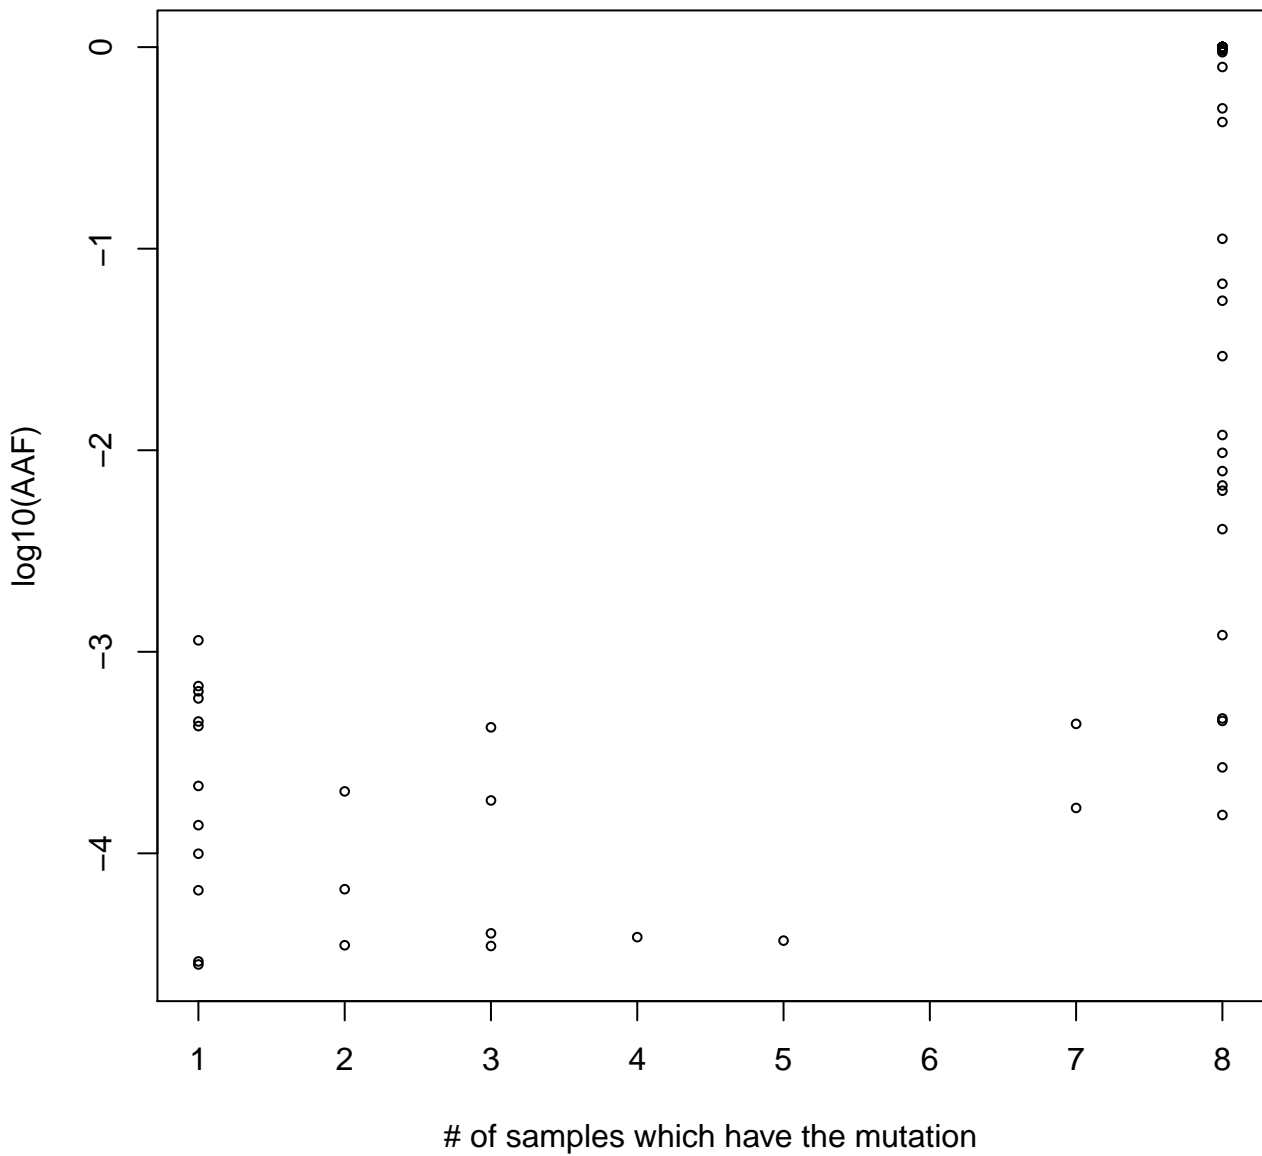

# DS

bioRxiv preprint doi: <https://doi.org/10.1101/617381>; this version posted September 12, 2019. The copyright holder for this preprint (which was not certified by peer review) is the author/funder, who has granted bioRxiv a license to display the preprint in perpetuity. It is made available under aCC-BY-NC-ND 4.0 International license.

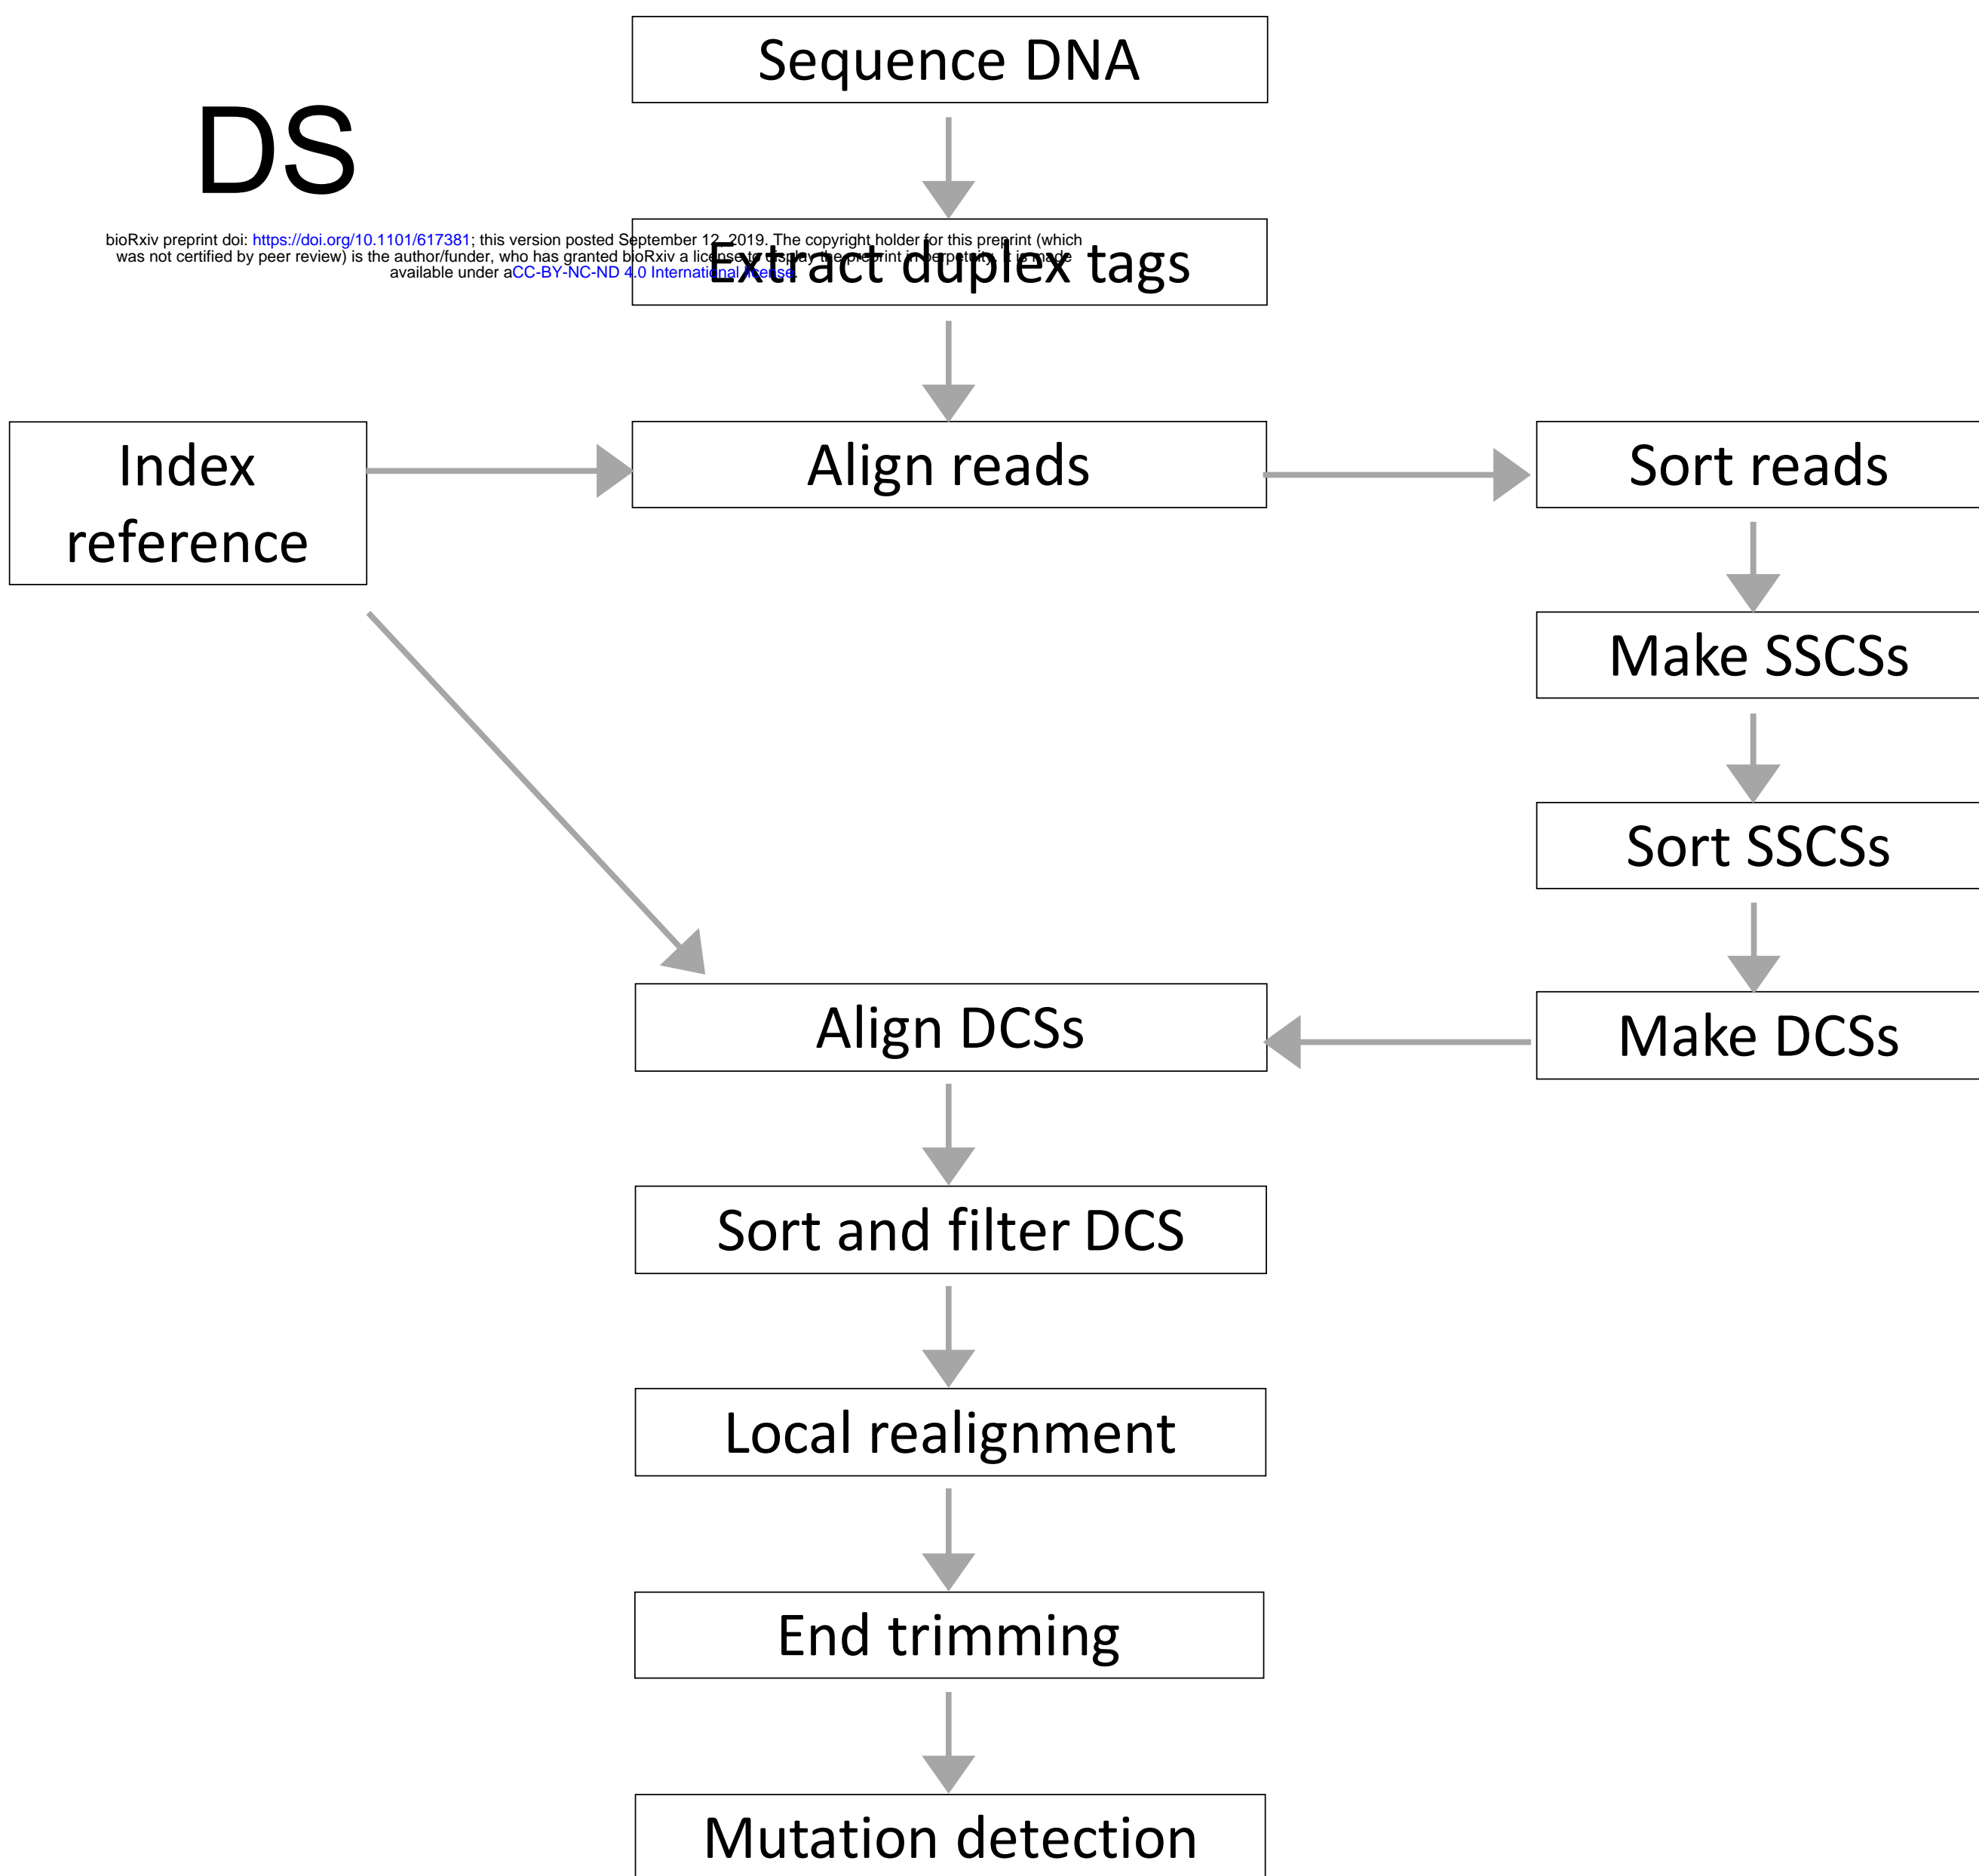

# LFMD

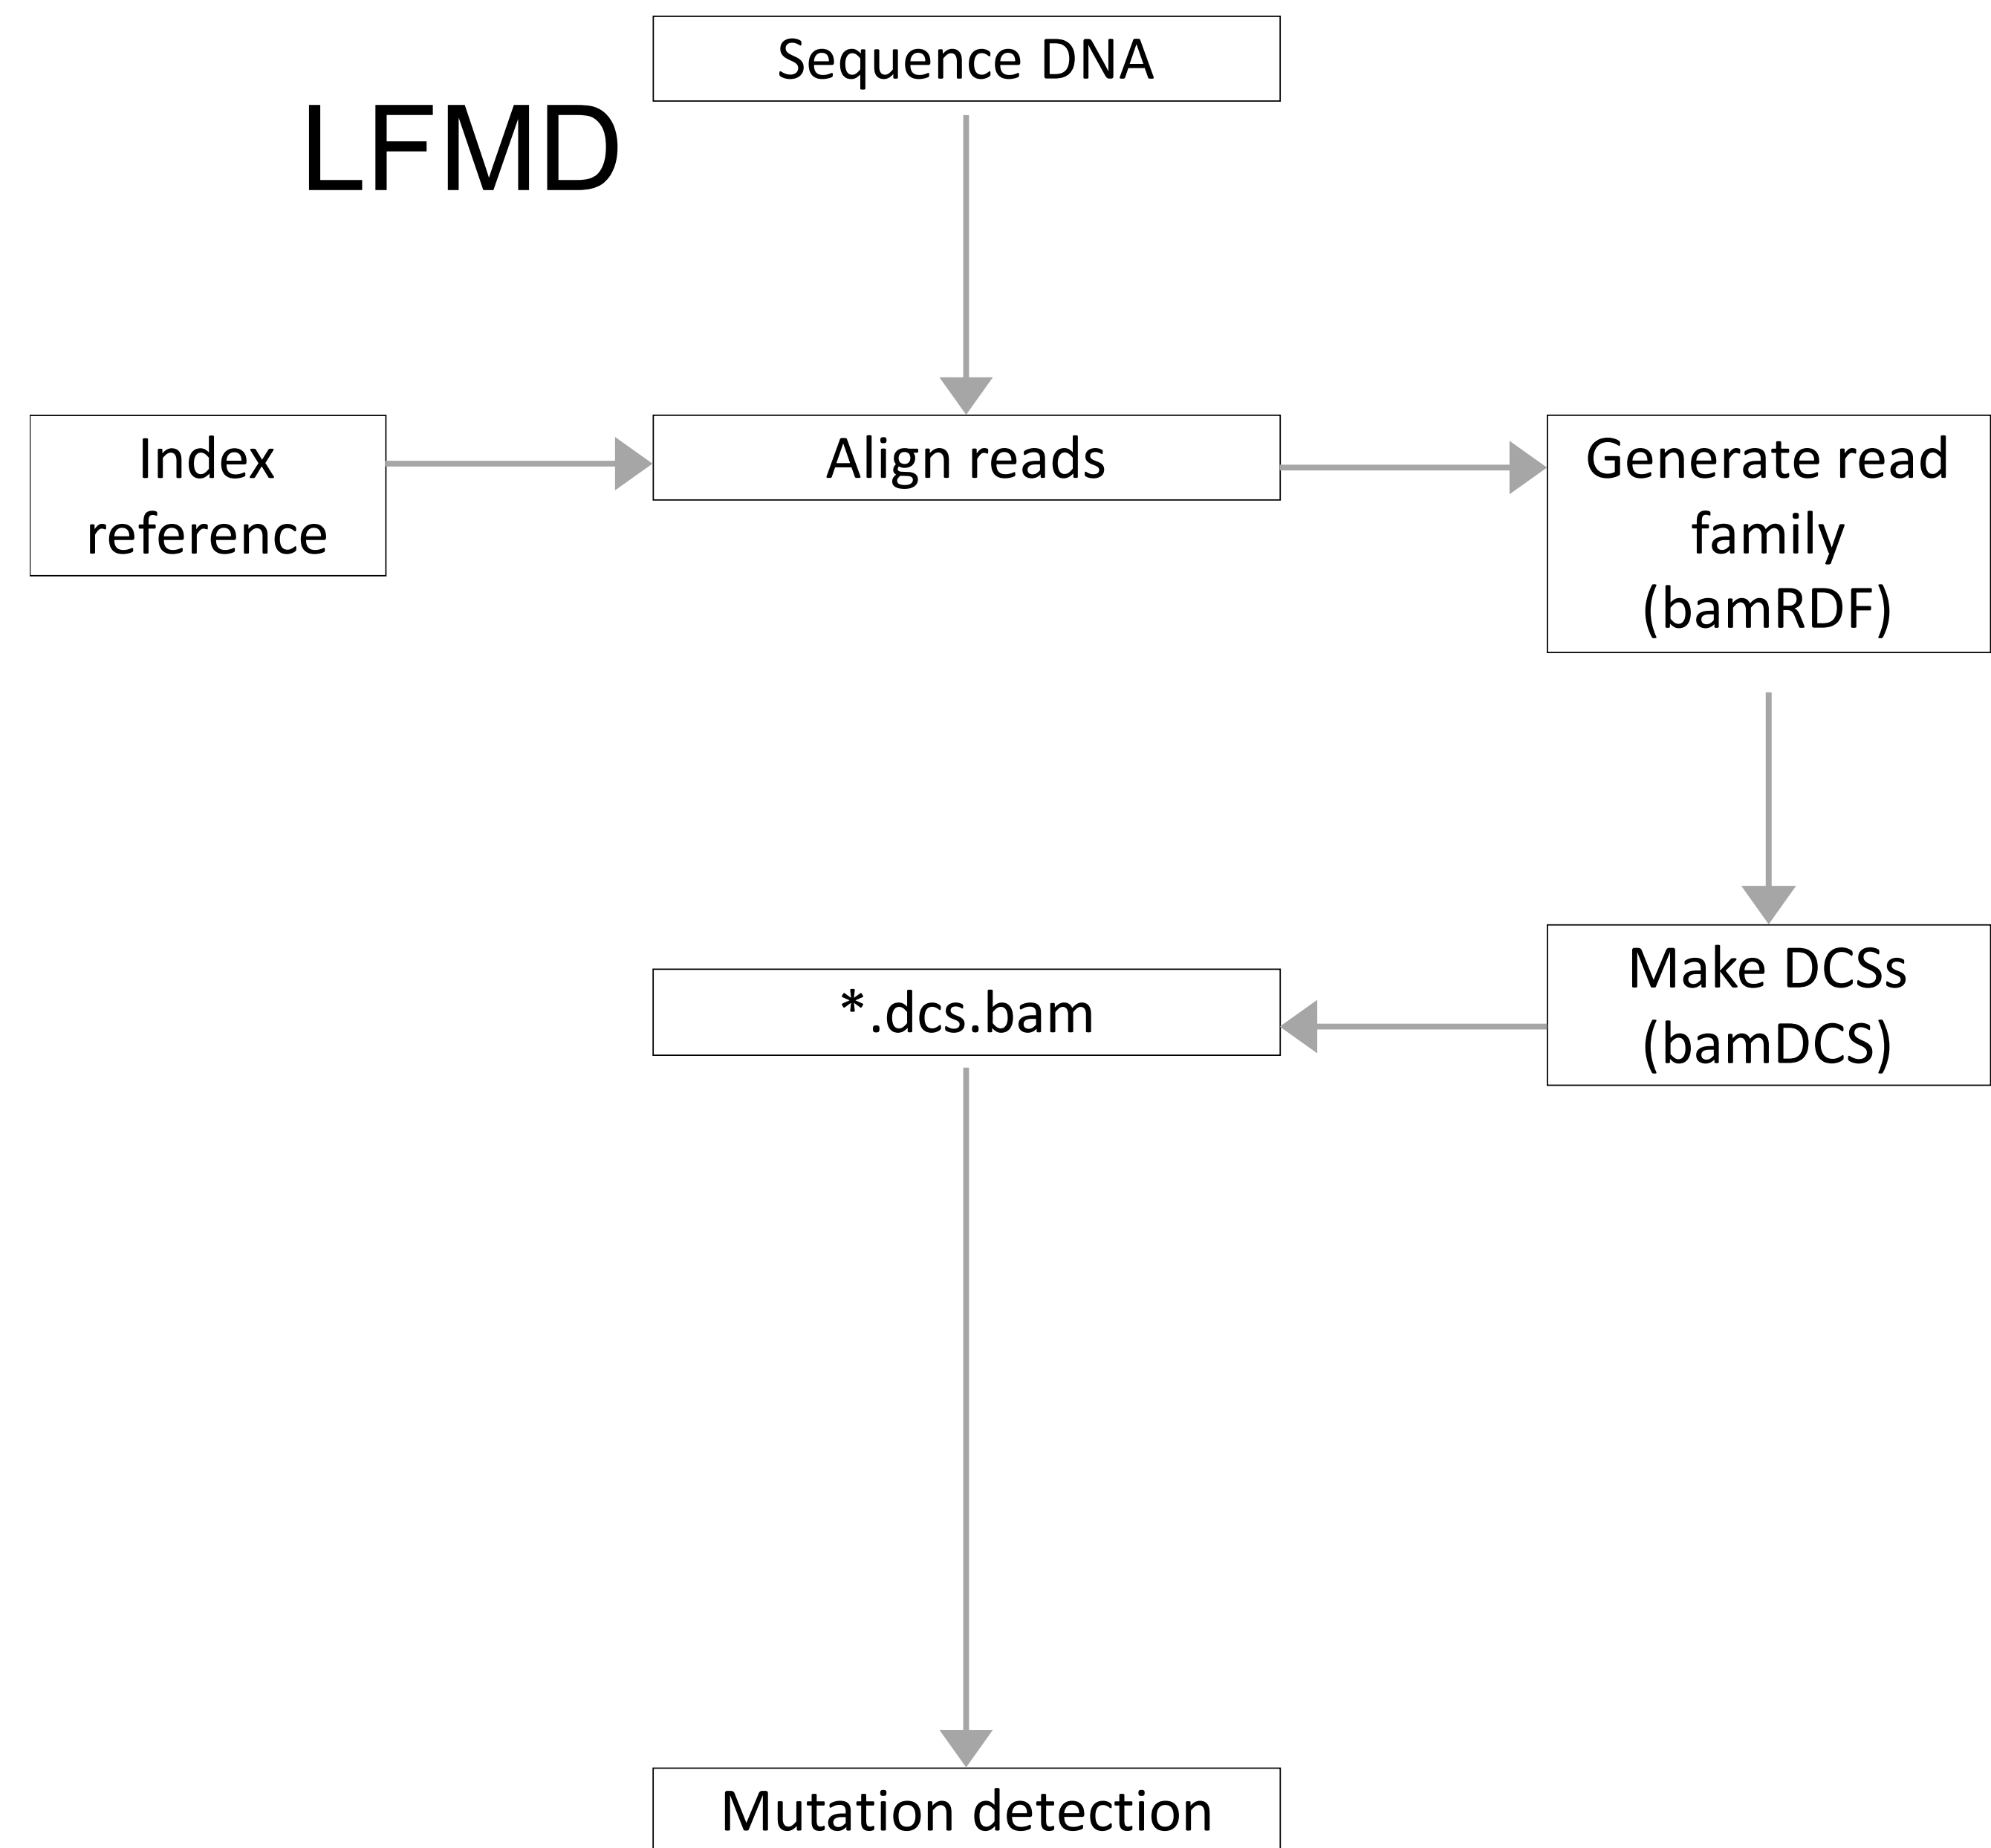

depth = 30000x

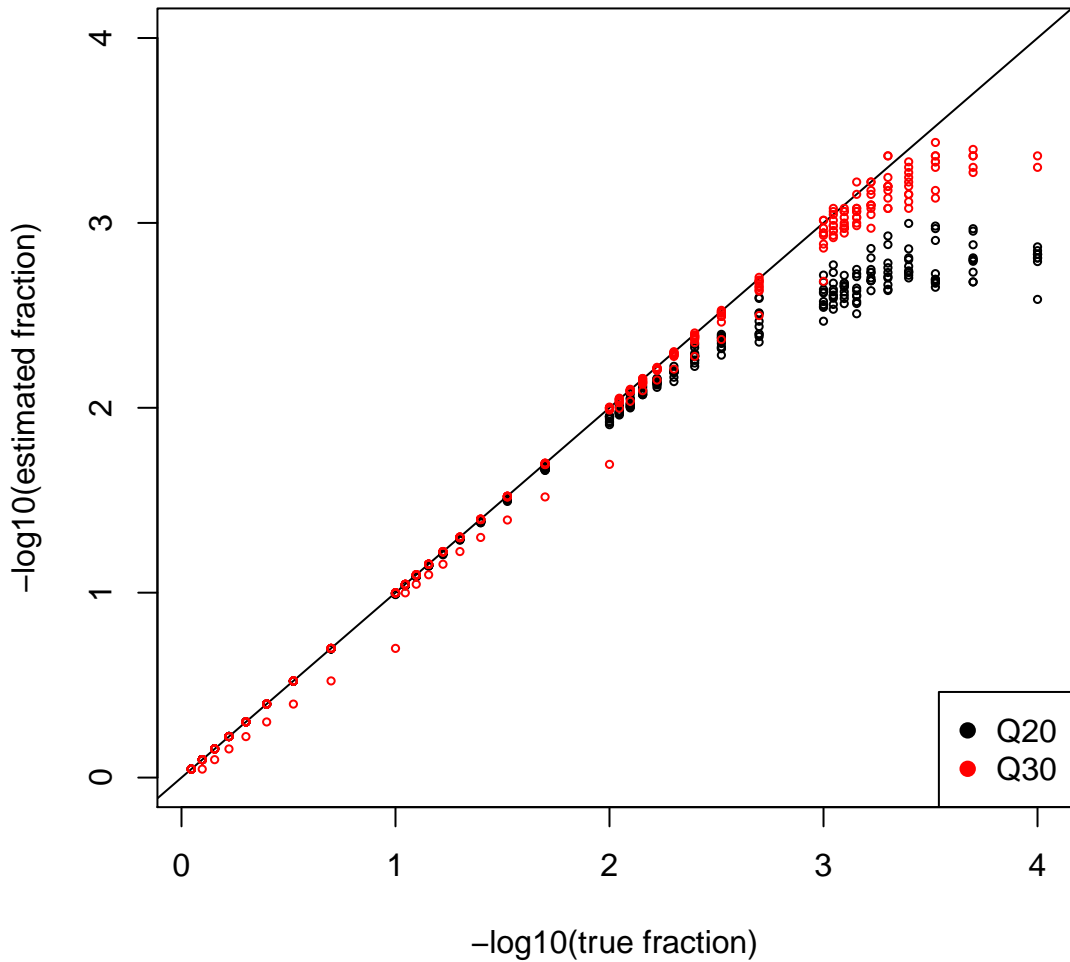

**Q20 bases to detect 1% mutations**

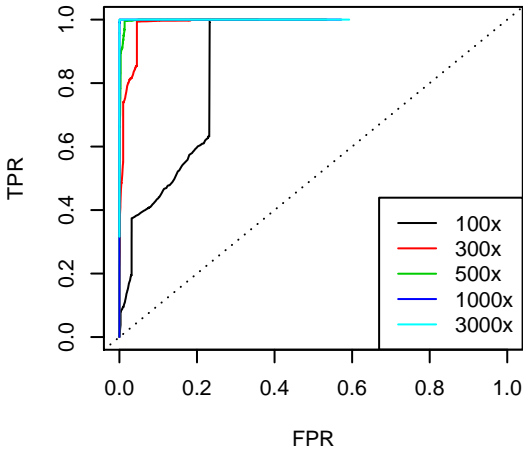

**Q20 bases to detect 1% mutations**

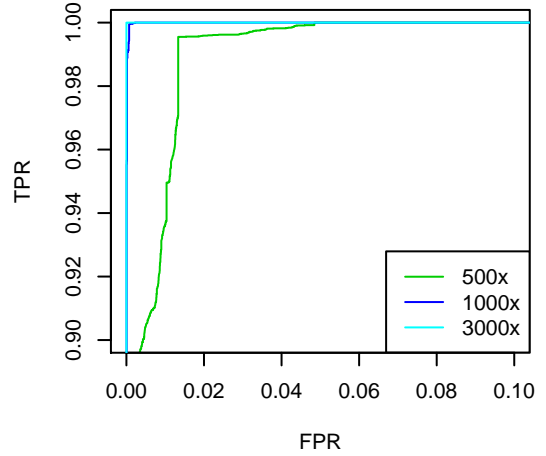

**Q20 bases to detect 0.1% mutations**

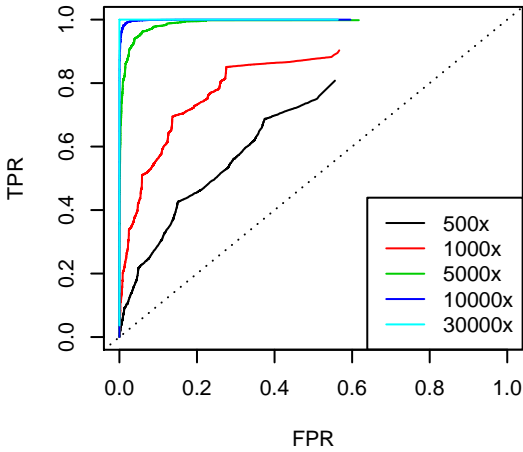

**Q20 bases to detect 0.1% mutations**

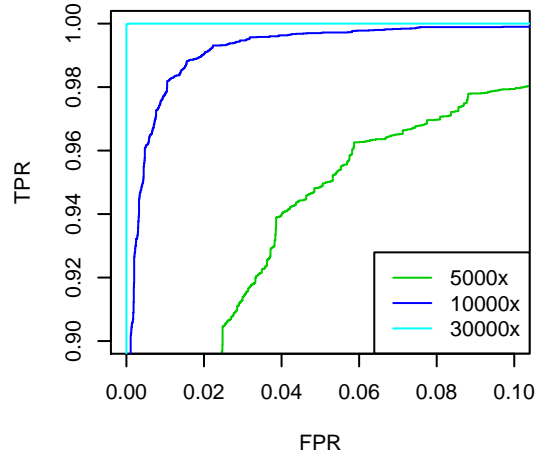

**Q20 bases to detect 0.01% mutations**

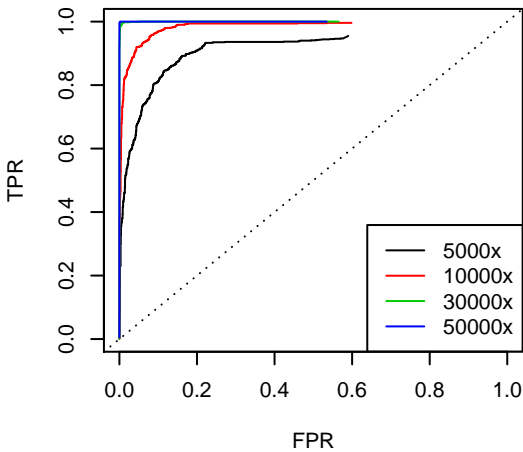

**Q20 bases to detect 0.01% mutations**

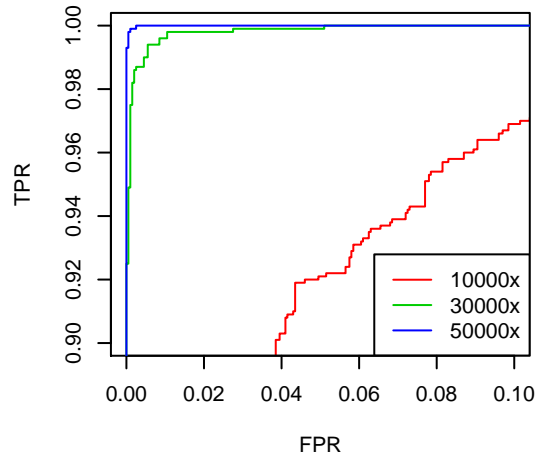

SNV

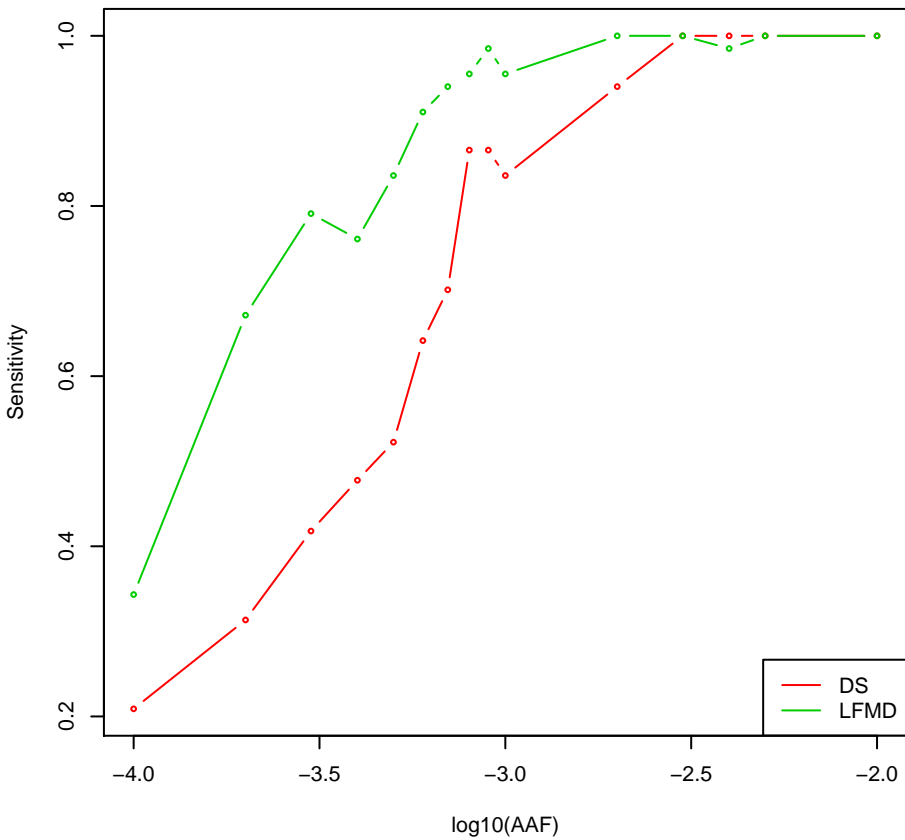

INS

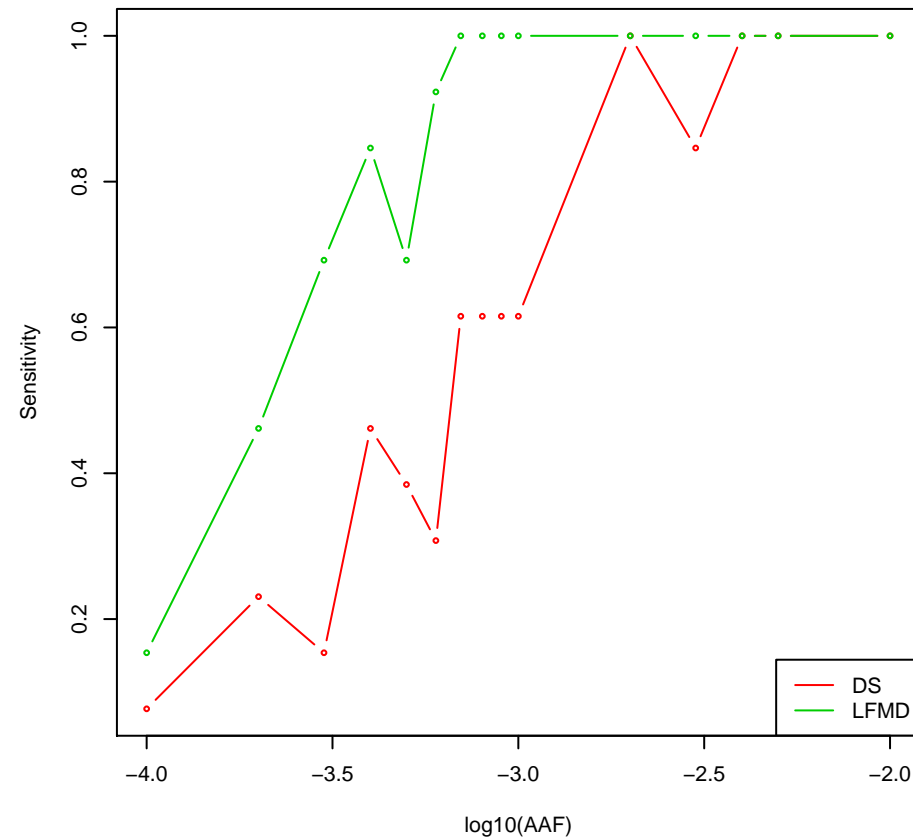

DEL

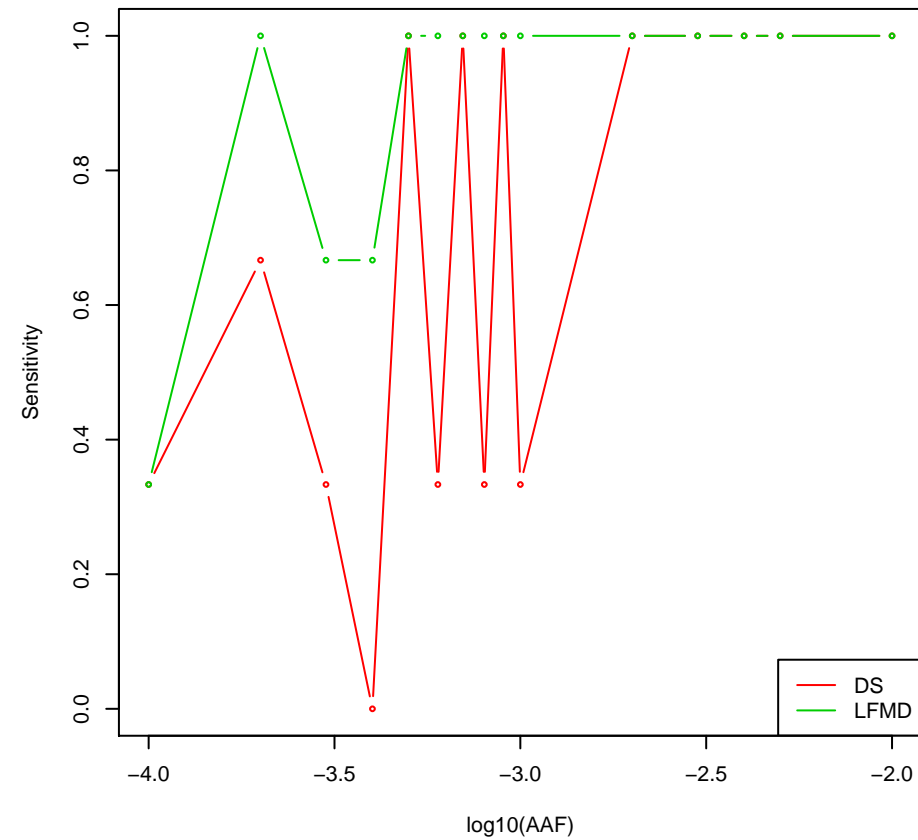

**N=5**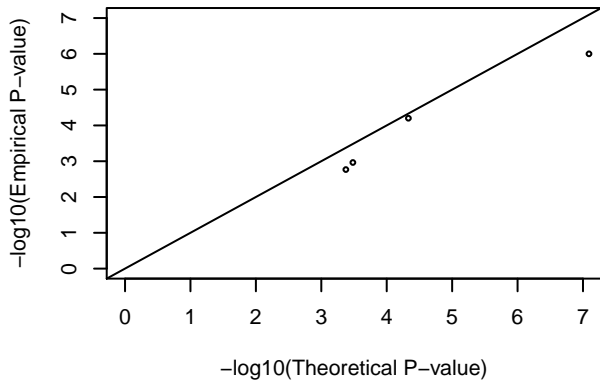**N=10**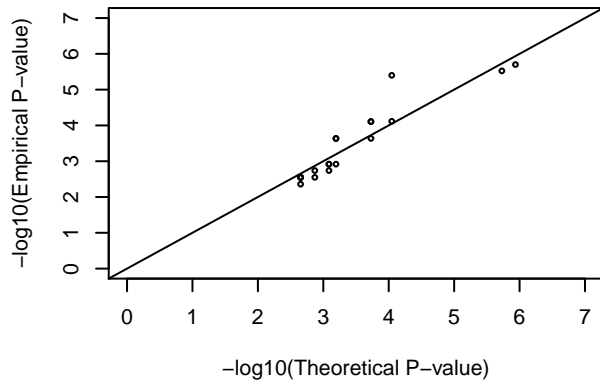**N=30**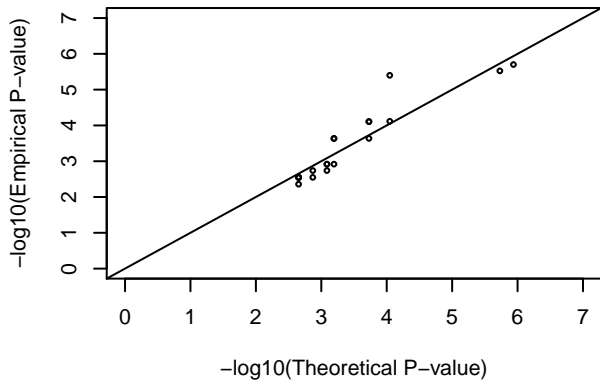**N=100**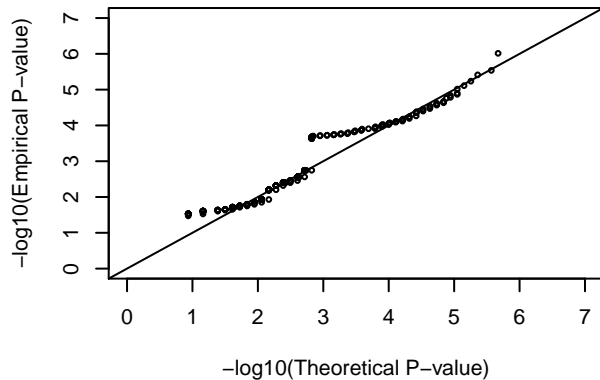**N=500**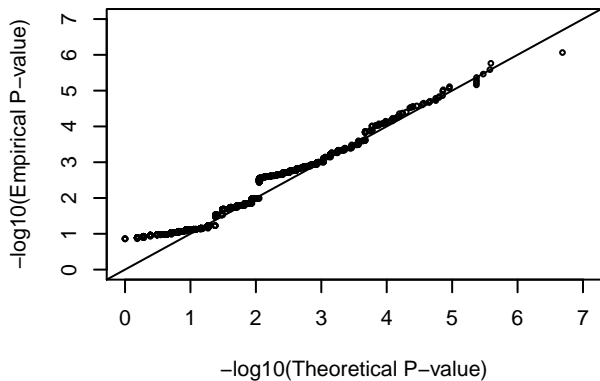**N=1000**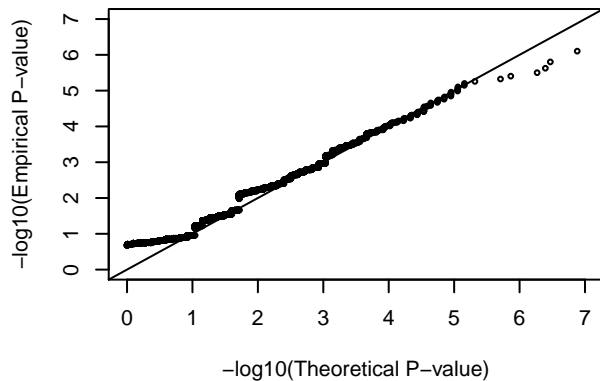



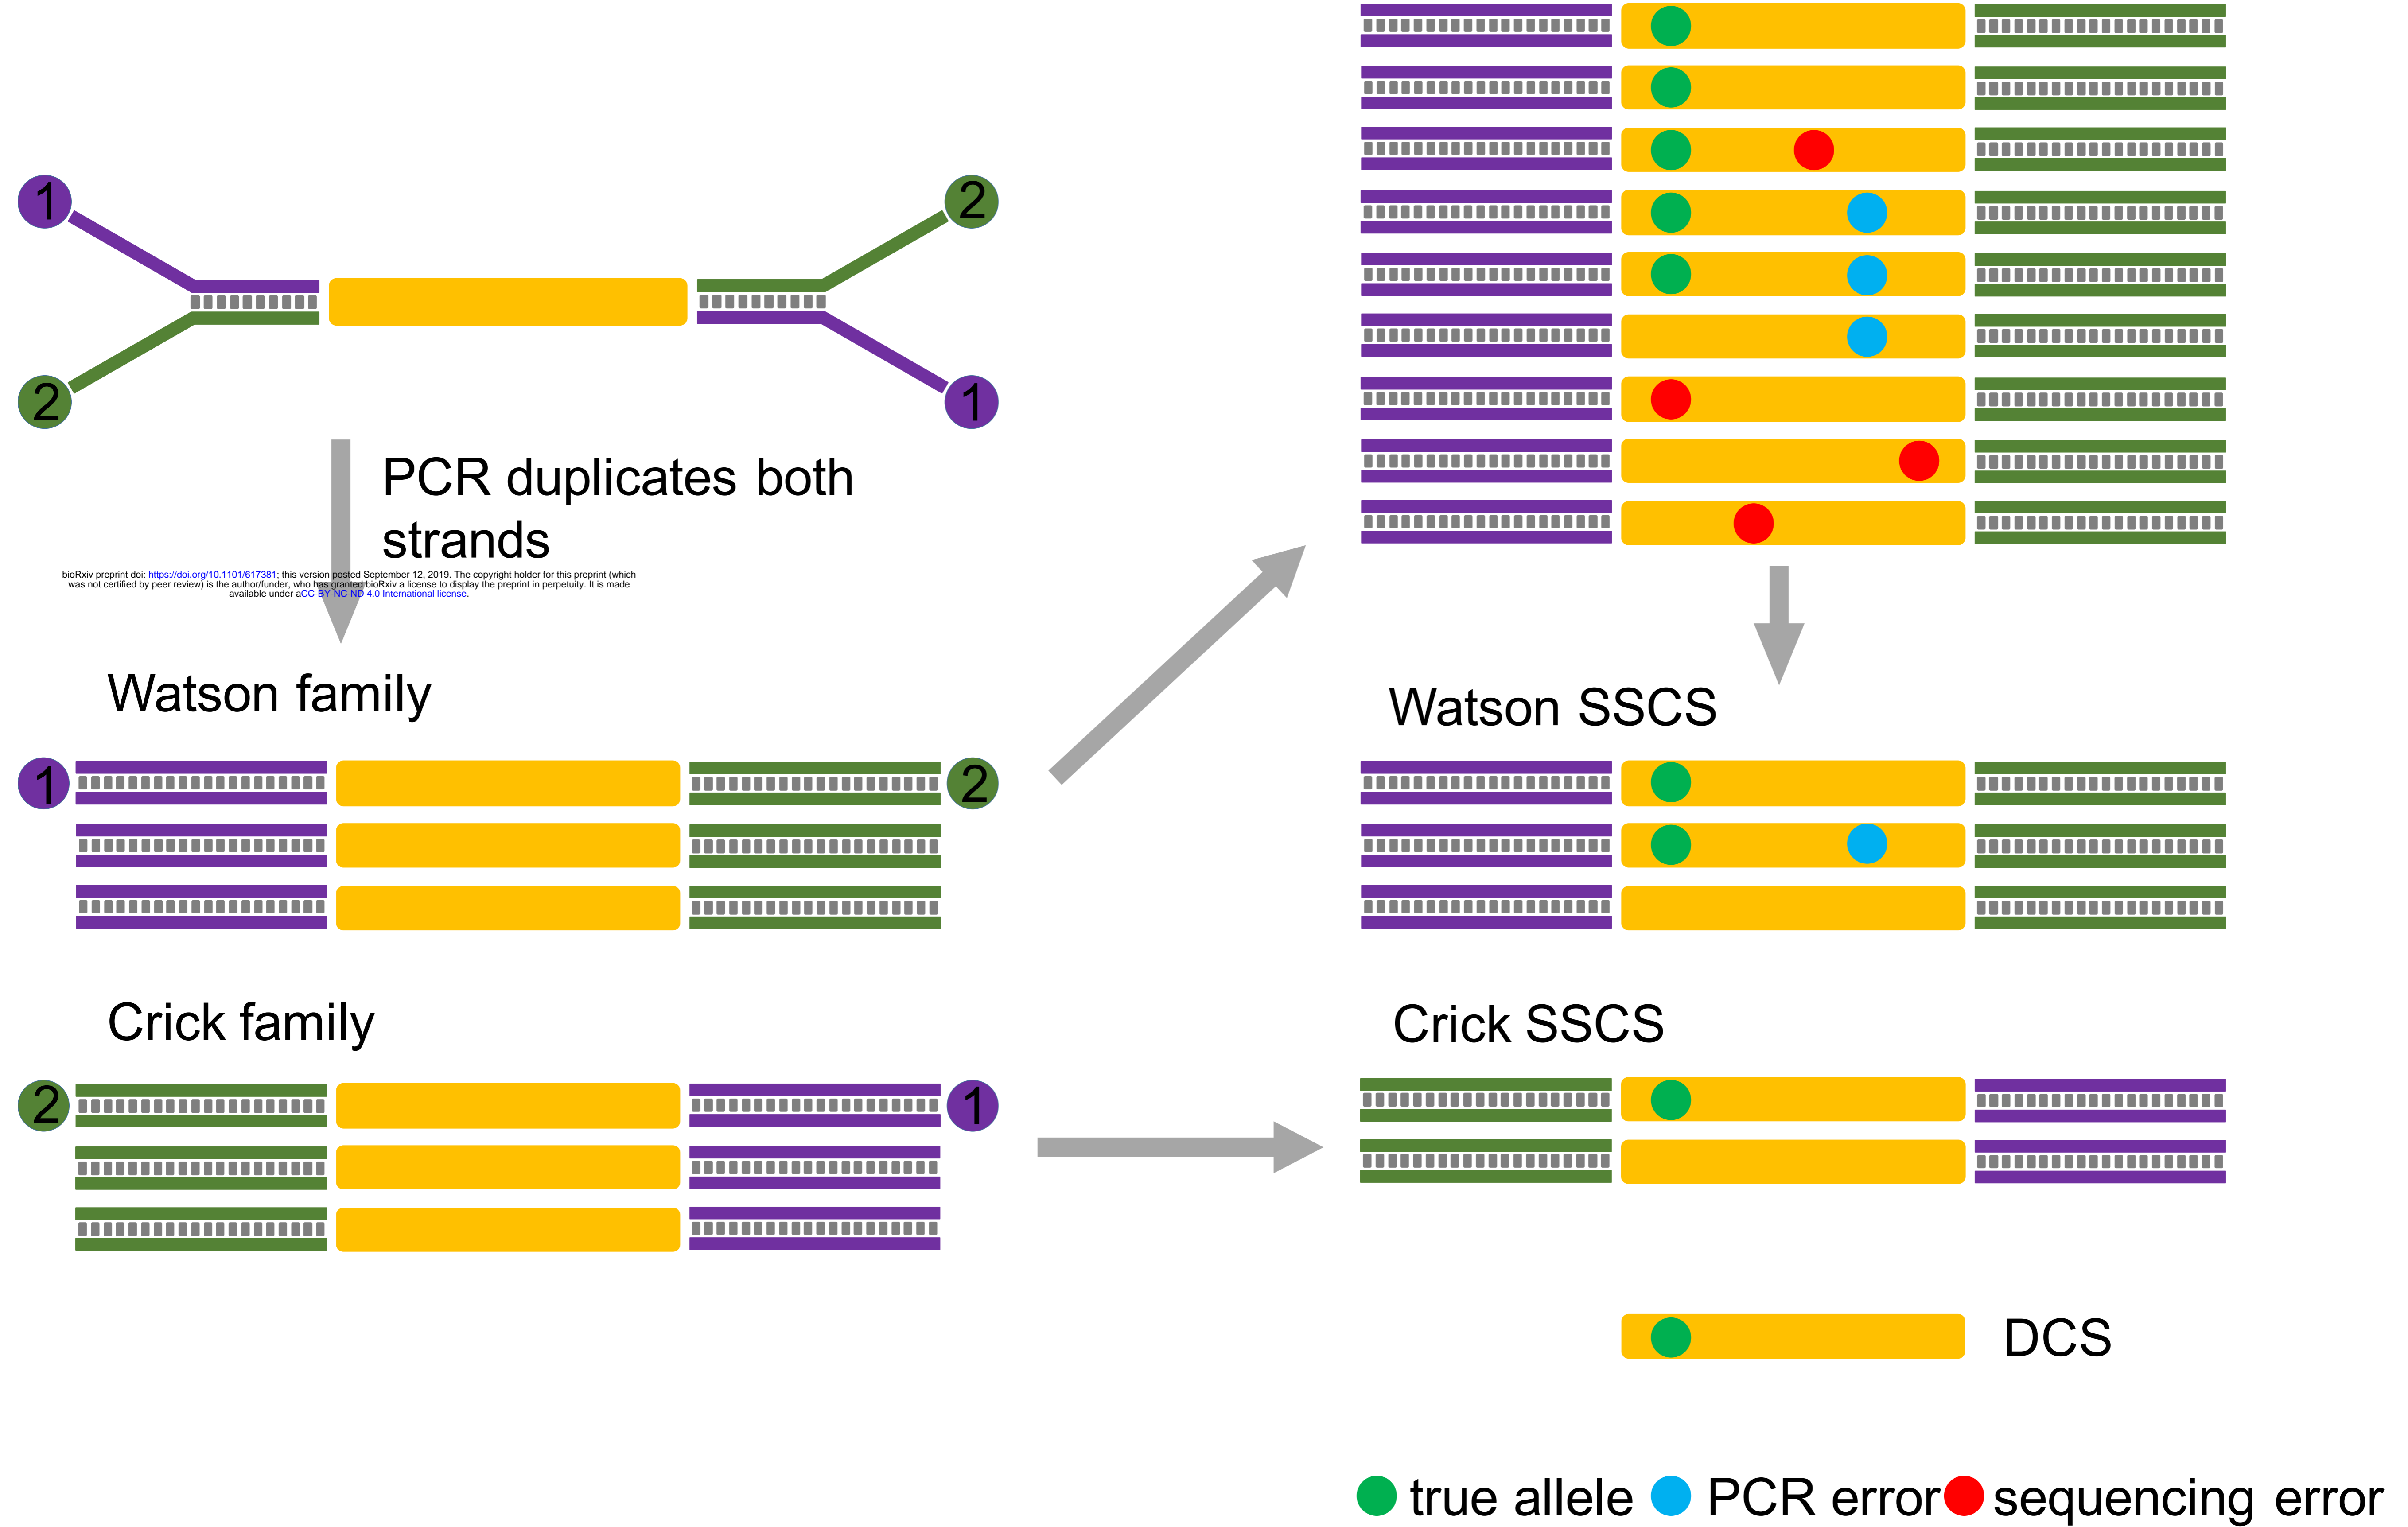

Source: https://www.biorxiv.org/content/biorxiv/early/2019/09/12/617381.full.pdf
