# Supplementary material for: LFMD: detecting low-frequency mutations in high-depth genome sequencing data without molecular tags
Source: bioRxiv or medRxiv preprint supplement (doi:10.1101/617381), 2020-11-18
Supplement: Supplementary file [file media-1.pdf]

## Supplemental materials

In order to utilize Chen et al's method(1), we need to introduce conditional events. Let  $\{\mathcal{A}_1, \dots, \mathcal{A}_K\}$  denote the set of conditional events which are mapped to four alleles at the position. Let  $k = 1, \dots, K$ , and  $K = 4$  be the total number of events. We get the log-likelihood component

$$\ell_k\{\theta; \mathcal{A}_k(x_i)\} = \sum_{x_i \in \mathcal{A}_k} \log P(x_i|\theta)$$

Then the composite conditional log-likelihood can be constructed as

$$\ell_c(\theta) = \sum_{i=1}^N \sum_{k=1}^K \omega_{ik} \ell_k\{\theta; \mathcal{A}(x_i)\}$$

in which we set

$$\omega_{ik} = 1$$

Let  $\hat{\theta}_c = \arg \max_{\theta \in \Omega} \ell_c(\theta)$  be the maximum composite likelihood estimator, and define the composite score function, sensitivity matrix, and variability matrix respectively as

$$U_c(\theta) = \frac{\partial \ell_c(\theta)}{\partial \theta}$$

$$H = \lim_{N \rightarrow \infty} -\frac{1}{N} E \left\{ \frac{\partial^2 \ell_c(\theta)}{\partial \theta^T \partial \theta} \right\}$$

$$V = \lim_{N \rightarrow \infty} \frac{1}{N} E \left[ \left\{ \frac{\partial \ell_c(\theta)}{\partial \theta} \right\} \left\{ \frac{\partial \ell_c(\theta)}{\partial \theta} \right\}^T \right]$$

The corresponding estimators of  $H$  and  $V$  are denoted by  $\hat{H}$  and  $\hat{V}$  evaluated at  $\hat{\theta}_c$ . The modified composite likelihood under boundary constraints was given by Chen et al(1) as

$$\ell_M(\theta) = \ell_c(\hat{\theta}_c) - \{T(\theta)^T \hat{H}_A T(\theta)\} \phi(\theta)$$

where

$$T(\theta) = N^{-1/2} \hat{H}^{-1} U_c(\hat{\theta}_c) - N^{1/2} (\theta - \hat{\theta}_c)$$

$$\hat{H}_A = \hat{H}\hat{V}^{-1}\hat{H}$$

$$\phi(\theta) = \frac{\ell_c(\theta) - \ell_c(\hat{\theta}_c)}{-T(\theta)^T \hat{H} T(\theta) + N^{-1} U_c(\hat{\theta}_c)^T \hat{H}^{-1} U_c(\hat{\theta}_c)}$$

Thus, we derive the adjusted likelihood ratio test

$$t_g = -2\{\ell_M(\theta_0) - \ell_M(\hat{\theta}_M)\} \sim \chi_1^2$$

where  $\hat{\theta}_M = \arg \max_{\theta \in \Omega} \ell_M(\theta)$  and  $\theta_0$  is the parameter  $\theta$  under null hypothesis  $H_0$ .

To facilitate the calculation of  $H$  and  $V$ , we let  $pmf(e)$  denote the probability mass function of sequencing error rate  $e$ , and the expected number of bases with  $e$  is represented as

$$\lim_{N \rightarrow \infty} N \cdot pmf(e)$$

Then, the expected number of bases  $g$  with  $e$  is

$$\lim_{N \rightarrow \infty} N \cdot pmf(e) \cdot \left\{ (1-e)\theta_g + \frac{e}{3}(1-\theta_g) \right\}$$

Thus,

$$E \left[ \frac{\partial \ell_c(\theta)}{\partial \theta_g} \right] = \lim_{N \rightarrow \infty} \sum_e \left\{ N \cdot pmf(e) \cdot \left\{ (1-e)\theta_g + \frac{e}{3}(1-\theta_g) \right\} \cdot \frac{1 - \frac{4e}{3}}{(1-e)\theta_g + \frac{e}{3}(1-\theta_g)} \right\}$$

$$= \lim_{N \rightarrow \infty} N \cdot \sum_e \left\{ pmf(e) \left( 1 - \frac{4e}{3} \right) \right\} = \lim_{N \rightarrow \infty} N \cdot C$$

where  $C$  is a finite constant. Then we derive

$$V = \lim_{N \rightarrow \infty} \frac{1}{N} E \left[ \left\{ \frac{\partial \ell_c(\theta)}{\partial \theta} \right\} \left\{ \frac{\partial \ell_c(\theta)}{\partial \theta} \right\}^T \right] = \lim_{N \rightarrow \infty} NC^2 \begin{pmatrix} 1 & 1 & 1 & 1 \\ 1 & 1 & 1 & 1 \\ 1 & 1 & 1 & 1 \\ 1 & 1 & 1 & 1 \end{pmatrix}$$

As a result,  $\hat{V}^{-1}$  tends to  $\mathbf{0}$  in the model, which means the adjustment is not necessary. To be clear, the special form of matrix  $V$  with all equal elements is due to the infinite  $N$  which ensures all possible  $e$  and  $g$  occur in the function  $\ell_c(\theta)$ . The  $V$  does not have a special form when  $N$  is a finite number. The simulation results are concordant with the theoretical results (Figure S1). The power of the model is evaluated in Figure S2.

**Figure S1.** The comparison between theoretical and empirical P-values from Monte Carlo procedures under truly distributed sequencing error rates. With the null hypothesis, one million simulations were conducted.

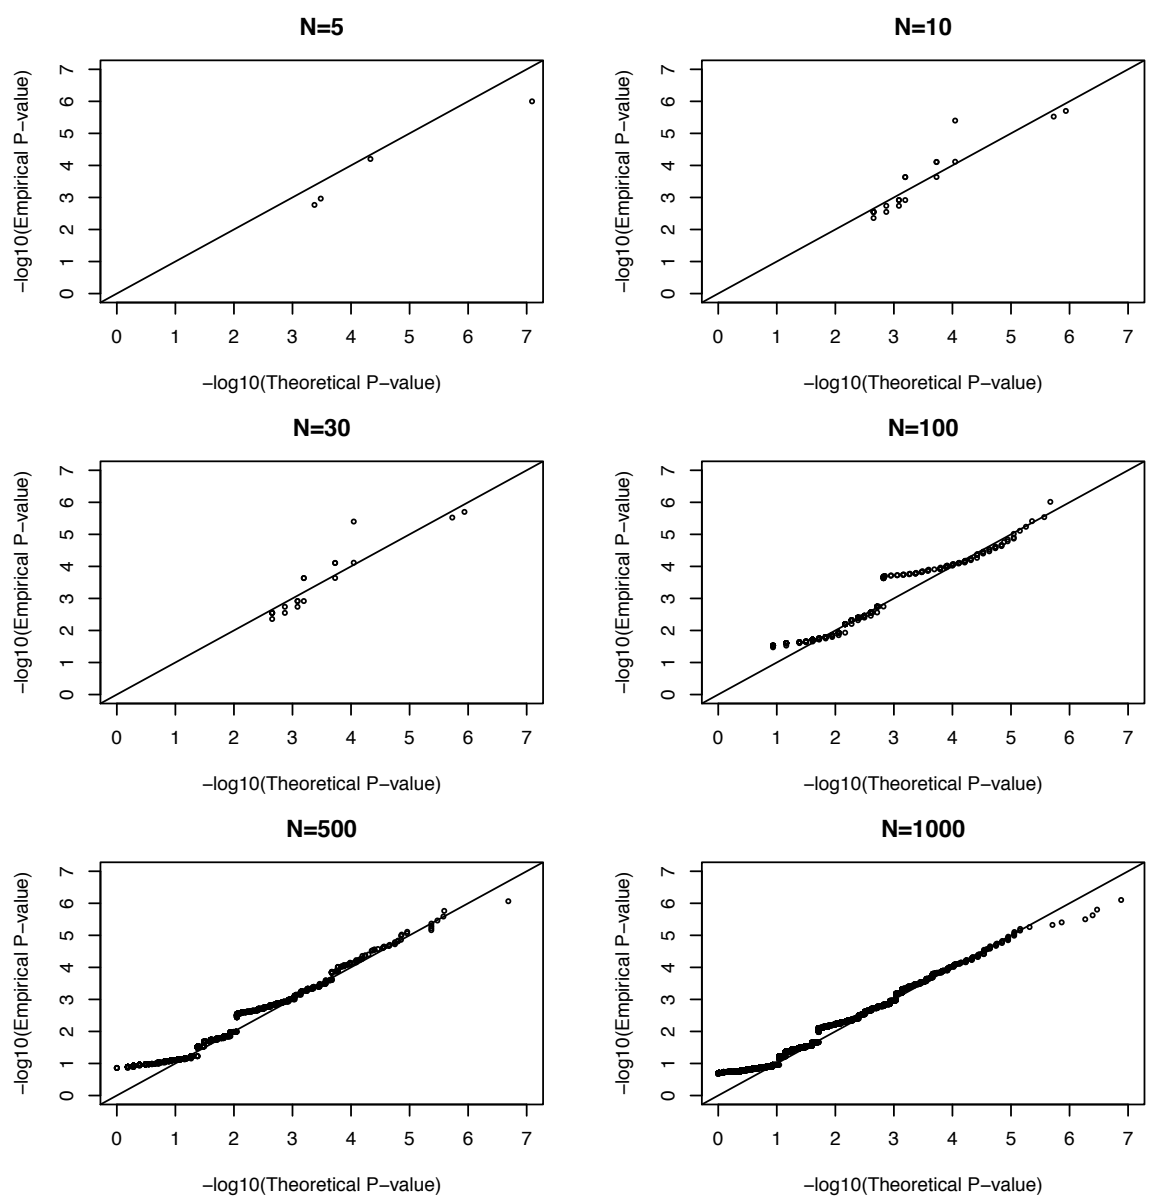

**Figure S2.** Receiver Operating Characteristic (ROC) curves of the likelihood-based model under uniformly distributed sequencing errors (Q20). We simulated 10,000 SNVs with a frequency equal to 1% or 0.1% and 1000 SNVs for 0.01%.

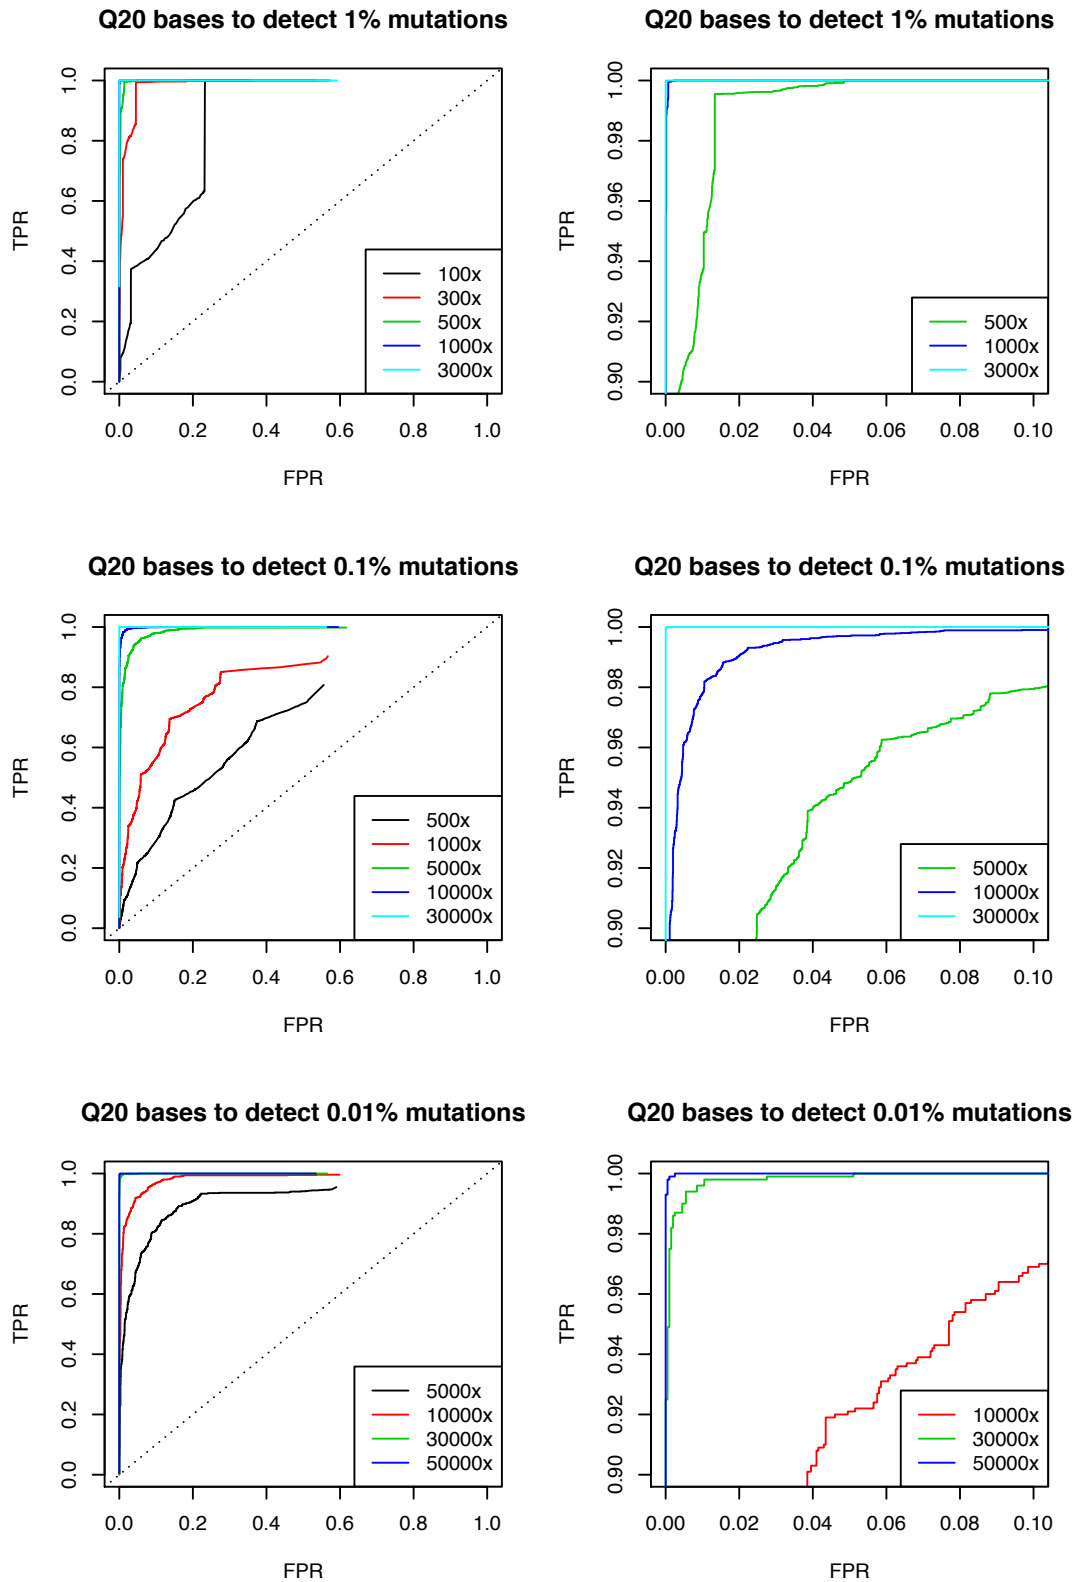

**Figure S3.** Estimation of allele frequency with the likelihood-based model under uniformly distributed sequencing errors.

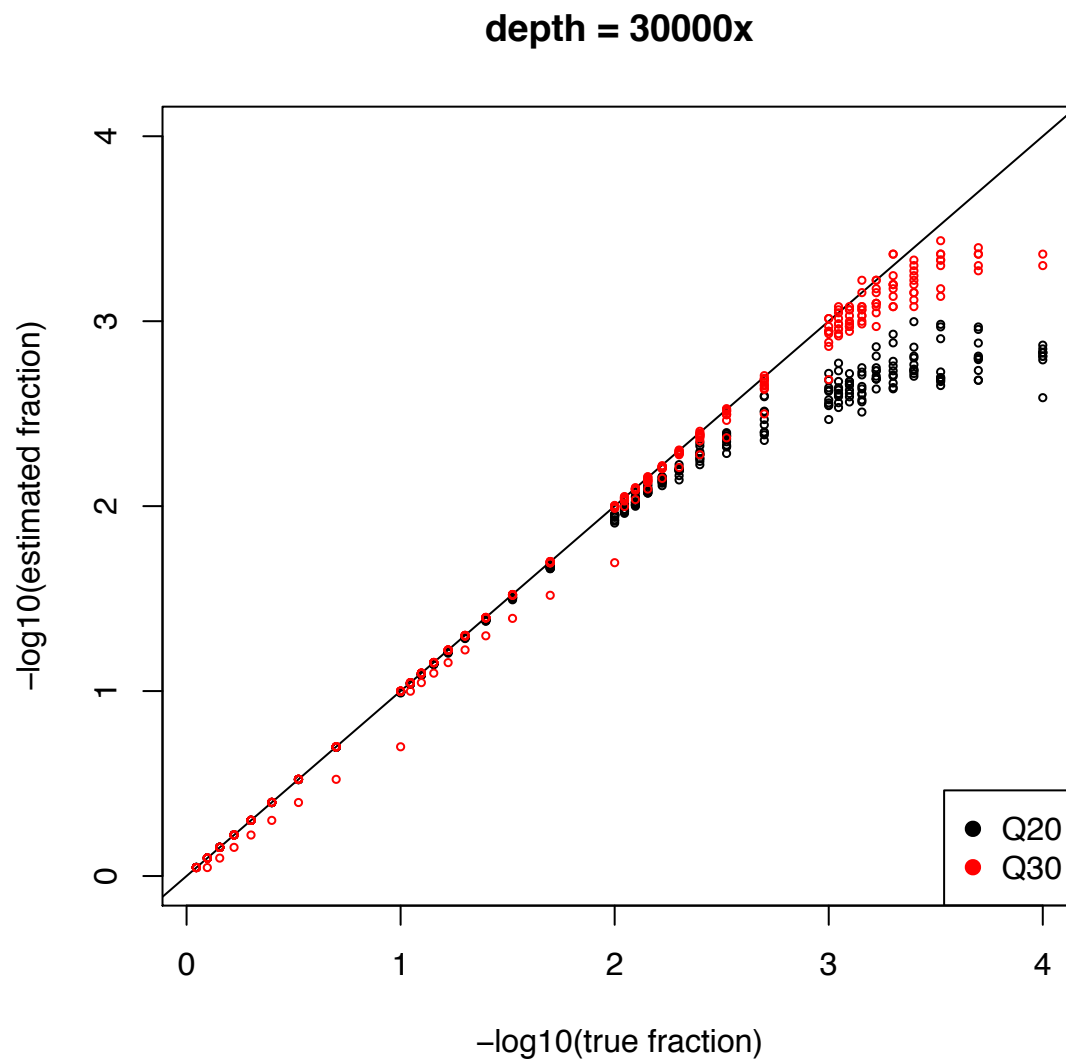

**Figure S4.** Pipelines of DS and LFMD.

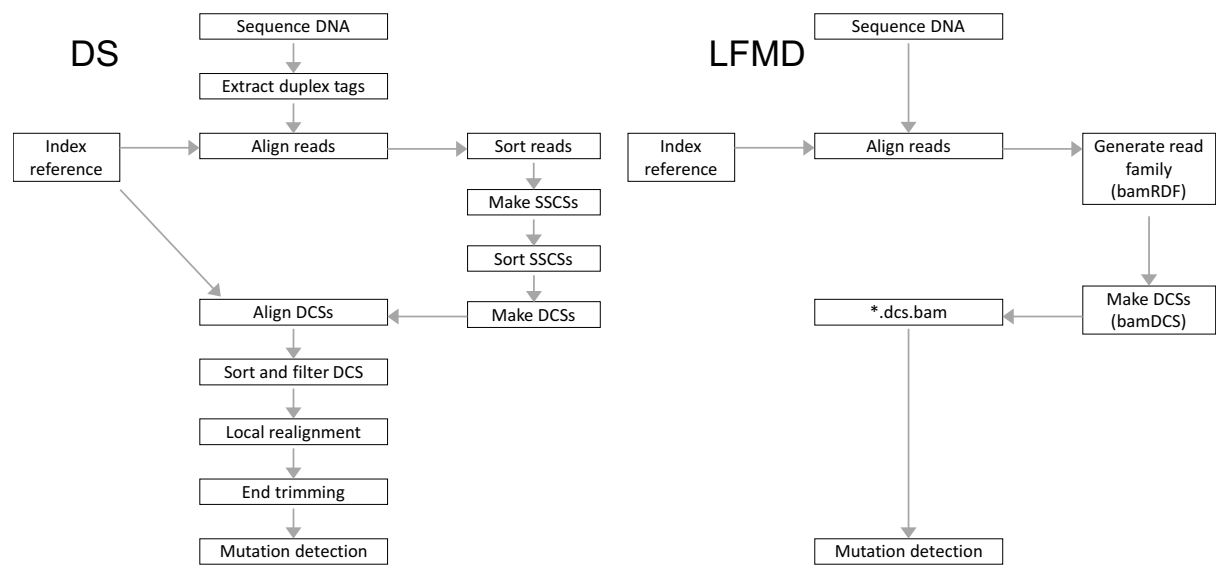

**Table S1.** The number of true positives detected by DS and LFMD. There are 67 single nucleotide variants (SNVs), 13 insertions (INSs), and 3 deletions (DELs) in the simulated data at every level of alternative allele frequency (AAF).

| AAF     | SNV |      | INS |      | DEL |      |
|---------|-----|------|-----|------|-----|------|
|         | DS  | LFMD | DS  | LFMD | DS  | LFMD |
| 1.0E-04 | 14  | 23   | 1   | 2    | 1   | 1    |
| 2.0E-04 | 21  | 45   | 3   | 6    | 2   | 3    |
| 3.0E-04 | 28  | 53   | 2   | 9    | 1   | 2    |
| 4.0E-04 | 32  | 51   | 6   | 11   | 0   | 2    |
| 5.0E-04 | 35  | 56   | 5   | 9    | 3   | 3    |
| 6.0E-04 | 43  | 61   | 4   | 12   | 1   | 3    |
| 7.0E-04 | 47  | 63   | 8   | 13   | 3   | 3    |
| 8.0E-04 | 58  | 64   | 8   | 13   | 1   | 3    |
| 9.0E-04 | 58  | 66   | 8   | 13   | 3   | 3    |
| 1.0E-03 | 56  | 64   | 8   | 13   | 1   | 3    |
| 2.0E-03 | 63  | 67   | 13  | 13   | 3   | 3    |
| 3.0E-03 | 67  | 67   | 11  | 13   | 3   | 3    |
| 4.0E-03 | 67  | 66   | 13  | 13   | 3   | 3    |
| 5.0E-03 | 67  | 67   | 13  | 13   | 3   | 3    |
| 1.0E-02 | 67  | 67   | 13  | 13   | 3   | 3    |

**Table S2.** The number of false positives detected by DS and LFMD.

| AAF     | SNV |      | INS |      | DEL |      |
|---------|-----|------|-----|------|-----|------|
|         | DS  | LFMD | DS  | LFMD | DS  | LFMD |
| 1.0E-04 | 0   | 0    | 0   | 0    | 0   | 0    |
| 2.0E-04 | 0   | 0    | 0   | 0    | 0   | 0    |
| 3.0E-04 | 0   | 0    | 0   | 0    | 0   | 0    |
| 4.0E-04 | 0   | 0    | 0   | 0    | 0   | 0    |
| 5.0E-04 | 1   | 0    | 0   | 0    | 0   | 0    |
| 6.0E-04 | 0   | 0    | 0   | 0    | 0   | 0    |
| 7.0E-04 | 0   | 0    | 0   | 0    | 0   | 0    |
| 8.0E-04 | 0   | 0    | 0   | 0    | 0   | 0    |
| 9.0E-04 | 0   | 0    | 0   | 0    | 0   | 0    |
| 1.0E-03 | 0   | 1    | 0   | 0    | 0   | 0    |
| 2.0E-03 | 0   | 0    | 0   | 0    | 0   | 0    |
| 3.0E-03 | 2   | 0    | 0   | 0    | 0   | 0    |
| 4.0E-03 | 0   | 0    | 0   | 0    | 0   | 0    |
| 5.0E-03 | 0   | 0    | 0   | 0    | 0   | 0    |
| 1.0E-02 | 0   | 0    | 0   | 0    | 0   | 0    |



**Table S3.** DS vs LFMD on 26 human mtDNA samples from Prof. Kennedy's laboratory.

| Sample | DS_only | Overlap | LFMD_only | DS_only<br>/Overlap | LFMD_only<br>/Overlap |
|--------|---------|---------|-----------|---------------------|-----------------------|
| 1440B  | 27      | 928     | 110       | 2.91%               | 11.85%                |
| 1440E  | 10      | 491     | 66        | 2.04%               | 13.44%                |
| 2384H  | 13      | 500     | 171       | 2.60%               | 34.20%                |
| 2384P  | 4       | 200     | 60        | 2.00%               | 30.00%                |
| 3080H  | 5       | 231     | 68        | 2.16%               | 29.44%                |
| 3080P  | 23      | 504     | 104       | 4.56%               | 20.63%                |
| 334B   | 14      | 592     | 100       | 2.36%               | 16.89%                |
| 334E   | 13      | 1332    | 142       | 0.98%               | 10.66%                |
| 409B   | 20      | 649     | 76        | 3.08%               | 11.71%                |
| 409E   | 10      | 994     | 134       | 1.01%               | 13.48%                |
| 511H   | 15      | 669     | 104       | 2.24%               | 15.55%                |
| 523B   | 2       | 494     | 57        | 0.40%               | 11.54%                |
| 523E   | 6       | 675     | 73        | 0.89%               | 10.81%                |
| 533B   | 1       | 216     | 52        | 0.46%               | 24.07%                |
| 533E   | 1       | 111     | 35        | 0.90%               | 31.53%                |
| 547H   | 4       | 411     | 104       | 0.97%               | 25.30%                |
| 547P   | 10      | 799     | 94        | 1.25%               | 11.76%                |
| 552B   | 14      | 467     | 87        | 3.00%               | 18.63%                |
| 552E   | 12      | 576     | 76        | 2.08%               | 13.19%                |
| 558P   | 7       | 82      | 40        | 8.54%               | 48.78%                |
| 626H   | 6       | 189     | 101       | 3.17%               | 53.44%                |
| 626P   | 5       | 165     | 76        | 3.03%               | 46.06%                |
| 652B   | 10      | 684     | 78        | 1.46%               | 11.40%                |
| 652E   | 3       | 595     | 54        | 0.50%               | 9.08%                 |
| 670B   | 8       | 753     | 73        | 1.06%               | 9.69%                 |
| 670E   | 1       | 116     | 41        | 0.86%               | 35.34%                |
| Median | /       | /       | /         | 2.02%               | 16.22%                |

**Table S4.** The number of mutations found in mtDNA of 8 YH cell lines. Under the hypothesis that true mutations should be identified from at least two samples, we detected 68 “true” mutations and then calculated TP, FP, TPR, and FDR.

| <b>Samples</b> | <b># of mutations</b> | <b>TP</b> | <b>FP</b> | <b>TPR</b> | <b>FDR</b> |
|----------------|-----------------------|-----------|-----------|------------|------------|
| L01_501        | 64                    | 63        | 1         | 92.65%     | 1.56%      |
| L01_502        | 68                    | 67        | 1         | 98.53%     | 1.47%      |
| L01_503        | 62                    | 62        | 0         | 91.18%     | 0.00%      |
| L01_504        | 65                    | 63        | 2         | 92.65%     | 3.08%      |
| L01_505        | 62                    | 60        | 2         | 88.24%     | 3.23%      |
| L01_506        | 61                    | 59        | 2         | 86.76%     | 3.28%      |
| L01_507        | 65                    | 62        | 3         | 91.18%     | 4.62%      |
| L01_508        | 62                    | 61        | 1         | 89.71%     | 1.61%      |
| Mean           | 63.63                 | 62.13     | 1.50      | 91.36%     | 2.36%      |
| SD             | 2.33                  | 2.42      | 0.93      | 3.55%      | 1.45%      |

**Table S5.** Five low-frequency SNVs found only by LFMD. AA is short for amino acid.

| <b>Position</b> | <b>Variant</b> | <b>Transcript</b> | <b>Function</b> | <b>cDNA<br/>Position</b> | <b>CDS<br/>Position</b> | <b>AA<br/>Position</b> | <b>AA<br/>Change</b> |
|-----------------|----------------|-------------------|-----------------|--------------------------|-------------------------|------------------------|----------------------|
| chr9:133738364  | A>G            | NM_005157         | coding          | 767                      | 764                     | 255                    | E>G                  |
| chr9:133738364  | A>G            | NM_007313         | coding          | 1260                     | 821                     | 274                    | E>G                  |
| chr9:133738367  | T>G            | NM_005157         | coding          | 770                      | 767                     | 256                    | V>G                  |
| chr9:133738367  | T>G            | NM_007313         | coding          | 1263                     | 824                     | 275                    | V>G                  |
| chr9:133748236  | C>T            | NM_005157         | intronic        |                          |                         |                        |                      |
| chr9:133748236  | C>T            | NM_007313         | intronic        |                          |                         |                        |                      |
| chr9:133748343  | T>G            | NM_005157         | coding          | 1007                     | 1004                    | 335                    | V>G                  |
| chr9:133748343  | T>G            | NM_007313         | coding          | 1500                     | 1061                    | 354                    | V>G                  |
| chr9:133756073  | A>C            | NM_005157         | intronic        |                          |                         |                        |                      |
| chr9:133756073  | A>C            | NM_007313         | intronic        |                          |                         |                        |                      |

**Table S6.** Long-range polymerase chain reaction (LR-PCR) primer sets.

| <b>Name</b> | <b>Sequence (5'-&gt;3')</b> | <b>Start</b> | <b>Stop</b> | <b>Product Length</b> |
|-------------|-----------------------------|--------------|-------------|-----------------------|
| LR-PCR1     | AACCAAACCCCAAAGACACC        | 550          | 569         | 9290                  |
|             | GCCAATAATGACGTGAAGTCC       | 9839         | 9819        |                       |
| LR-PCR2     | TCCCCTCCTAAACACATCC         | 9592         | 9611        | 7626                  |
|             | TTTATGGGGTGATGTGAGCC        | 645          | 626         |                       |
| LR-PCR4     | AAGAGTGCTACTCTCCTCGCTCCG    | 16432        | 16455       | 16569                 |
|             | GTGCGGGATATTGATTCACGGAGG    | 16431        | 16407       |                       |

**Table S7.** Mutations simulated in the mixed double-strand sequencing data. The number of original background DNA fragments in the simulation is  $10^6$ .

| Chromosome | Position | Reference | Alternative | Type |
|------------|----------|-----------|-------------|------|
| MT         | 70       | G         | T           | snv  |
| MT         | 270      | A         | C           | snv  |
| MT         | 470      | A         | C           | snv  |
| MT         | 670      | C         | G           | snv  |
| MT         | 870      | C         | G           | snv  |
| MT         | 1070     | C         | CGA         | ins  |
| MT         | 1270     | T         | A           | snv  |
| MT         | 1470     | A         | C           | snv  |
| MT         | 1670     | A         | C           | snv  |
| MT         | 1870     | A         | C           | snv  |
| MT         | 2070     | C         | CGA         | ins  |
| MT         | 2270     | A         | C           | snv  |
| MT         | 2470     | G         | T           | snv  |
| MT         | 2670     | C         | G           | snv  |
| MT         | 2870     | G         | T           | snv  |
| MT         | 3070     | G         | GTCT        | ins  |
| MT         | 3270     | C         | G           | snv  |
| MT         | 3470     | T         | A           | snv  |
| MT         | 3670     | G         | T           | snv  |
| MT         | 3870     | C         | G           | snv  |
| MT         | 4070     | A         | AC          | ins  |
| MT         | 4270     | T         | A           | snv  |
| MT         | 4470     | A         | C           | snv  |
| MT         | 4670     | C         | G           | snv  |
| MT         | 4870     | A         | C           | snv  |
| MT         | 5070     | A         | AC          | ins  |
| MT         | 5270     | C         | G           | snv  |
| MT         | 5470     | C         | G           | snv  |
| MT         | 5670     | A         | C           | snv  |

|    |       |   |      |     |
|----|-------|---|------|-----|
| MT | 5870  | T | A    | snv |
| MT | 6070  | T |      | del |
| MT | 6270  | G | T    | snv |
| MT | 6470  | A | C    | snv |
| MT | 6670  | A | C    | snv |
| MT | 6870  | T | A    | snv |
| MT | 7070  | C | CGA  | ins |
| MT | 7270  | T | A    | snv |
| MT | 7470  | C | G    | snv |
| MT | 7670  | A | C    | snv |
| MT | 7870  | T | A    | snv |
| MT | 8070  | C | CGA  | ins |
| MT | 8270  | C | G    | snv |
| MT | 8470  | A | C    | snv |
| MT | 8670  | A | C    | snv |
| MT | 8870  | T | A    | snv |
| MT | 9070  | T |      | del |
| MT | 9270  | C | G    | snv |
| MT | 9470  | C | G    | snv |
| MT | 9670  | A | C    | snv |
| MT | 9870  | C | G    | snv |
| MT | 10070 | C | CGA  | ins |
| MT | 10270 | T | A    | snv |
| MT | 10470 | A | C    | snv |
| MT | 10670 | C | G    | snv |
| MT | 10870 | C | G    | snv |
| MT | 11070 | T |      | del |
| MT | 11270 | C | G    | snv |
| MT | 11470 | A | C    | snv |
| MT | 11670 | A | C    | snv |
| MT | 11870 | C | G    | snv |
| MT | 12070 | G | GTCT | ins |
| MT | 12270 | T | A    | snv |

|    |       |   |     |     |
|----|-------|---|-----|-----|
| MT | 12470 | T | A   | snv |
| MT | 12670 | C | G   | snv |
| MT | 12870 | C | G   | snv |
| MT | 13070 | C | CGA | ins |
| MT | 13270 | C | G   | snv |
| MT | 13470 | A | C   | snv |
| MT | 13670 | A | C   | snv |
| MT | 13870 | A | C   | snv |
| MT | 14070 | A | AC  | ins |
| MT | 14270 | A | C   | snv |
| MT | 14470 | T | A   | snv |
| MT | 14670 | T | A   | snv |
| MT | 14870 | A | C   | snv |
| MT | 15070 | C | CGA | ins |
| MT | 15270 | T | A   | snv |
| MT | 15470 | T | A   | snv |
| MT | 15670 | T | A   | snv |
| MT | 15870 | A | C   | snv |
| MT | 16070 | A | AC  | ins |
| MT | 16270 | C | G   | snv |
| MT | 16470 | G | T   | snv |

---

## References

1. Chen, Y., Huang, J., Ning, Y., Liang, K.-Y. and Lindsay, B.G. (2017) A conditional composite likelihood ratio test with boundary constraints. *Biometrika*, **105**, 225-232.
